# Supplementary material for: Engineered zinc-finger transcription factors activate OCT4 (POU5F1), SOX2, KLF4, c-MYC (MYC) and miR302/367
Source: PubMed Central journal article supplement (PMC4041418; doi:10.1093/nar/gku243), 2014-05-03
Supplement: supp_gku243_nar-01672-h-2013-File003.pdf [file supp_gku243_nar-01672-h-2013-File003.pdf]

Supplementary Table 1. ZF-TFs for OCT4

| Name                  | target site                         | Fingers  | Oct4 activation (Fold) |
|-----------------------|-------------------------------------|----------|------------------------|
| ZF(OCT4-2404)         | atTGAGATGGCTGGGGAGGGgcctcctc        | 6        | 2.0                    |
| ZF(OCT4-2256)         | gaCCTGTGGCAGGTATTGAAatgcacgc        | 6        | 1.6                    |
| ZF(OCT4-1459)         | tgTGAGGGGATTGGGACTGGgggggttg        | 6        | 1.2                    |
| ZF(OCT4-1444)         | acTGGGGGGTTGGGGAGCAGgaagcagt        | 6        | 1.0                    |
| ZF(OCT4-1417)         | tcCCCAGGGGAGCCATCCAGgcccattc        | 6        | 1.0                    |
| ZF(OCT4-1351)         | ctGGGGACCGGGATTGTCCAagccaaggc       | 6        | 2.6                    |
| ZF(OCT4-1222)         | ggCCTAGGGCTGGAGGCCTGggccaggg        | 6        | 2.0                    |
| ZF(OCT4-1210)         | gaGGCCTGGGCCAGGGAGGTgggggagg        | 6        | 6.6                    |
| <b>ZF(OCT4-1197)</b>  | <b>ggGAGGTGGGGGAGGGAGAAcggggcct</b> | <b>6</b> | <b>64.0</b>            |
| ZF(OCT4-1015)         | ttGAAGGGGAAGTAGGGGCCaaccctt         | 6        | 1.9                    |
| ZF(OCT4-952)          | tgGAAGACGGAGGGGTGGGGgatgggg         | 6        | 7.9                    |
| ZF(OCT4-865)          | atTTGGCAGGCTGGGCAGATggtgccag        | 6        | 1.0                    |
| ZF(OCT4-720)          | atGCATTGAGGGATaGCGCCAcnnnnnn        | 6        | 1.9                    |
| ZF(OCT4+52)           | tcCCCATGGCGGGACACCTGgcttcgga        | 6        | 1.1                    |
| ZF(OCT4+104)          | tgGTGGAGGTGATGGGCCAGgggggccc        | 6        | 3.0                    |
| ZF(OCT4+111)          | ggTGATGGGCCAGGGGGGCCggagccc         | 6        | 2.5                    |
| ZF(OCT4+123)          | ggGGGGCCGGAGCCGGGCTGggttgatc        | 6        | 1.6                    |
| ZF(OCT4+130)          | cgGAGCCGGGCTGGGTTGATcctcggac        | 6        | 2.0                    |
| ZF(OCT4+176)          | ccCTCCTGGAGGGCCAGGAAtcgggccc        | 6        | 1.7                    |
| ZF(OCT4+177)          | ccTCCTGGAGGGCCAGGaAtcgggccc         | 5        | 0.7                    |
| ZF(OCT4+181)          | ctGGAGGGcCAGGAATCGGGCnnnnnn         | 6        | 2.5                    |
| ZF(OCT4+261)          | ttCTGTGGGGGGATGGCGTActgtgggc        | 6        | 10.5                   |
| ZF(OCT4+286)          | ggCCCCAGGTTGGAGTGGGGctagtgcc        | 6        | 2.6                    |
| ZF(OCT4+349)          | aaGCAGGAGTCGGGGTGGAGagcaactc        | 6        | 2.1                    |
| ZF(OCT4+420)          | gtGAAGCTGGAGAAGGAGAAgctggagc        | 6        | 19.5                   |
| ZF(OCT4-r2475)        | tcTCAGAGGAGGGGGAGGGGcaggcctg        | 6        | 1.1                    |
| ZF(OCT4-r2352)        | ngGGGTGGGAGGAACATGCTtcggaaca        | 6        | 1.7                    |
| <b>ZF(OCT4-r2342)</b> | <b>ggGGCCTGGTGGGGGTGGGAggaacatg</b> | <b>6</b> | <b>22.1</b>            |
| ZF(OCT4-r2325)        | aaAGGCAGGTAGATTATGGGgcctggtg        | 6        | 1.6                    |
| ZF(OCT4-r2279)        | gcAGTGGGGTTGGAGCTGTGttcattc         | 6        | 1.3                    |
| ZF(OCT4-r1960)        | tcGAAGGCCAGAAGGCCAGGtctggact        | 6        | 1.0                    |
| ZF(OCT4-r1926)        | caGAGGGGGCTCTGGGCCAGggctcccc        | 6        | 2.2                    |
| ZF(OCT4-r1917)        | tgGGGGCTCCAGAGGGGGCTctgggcca        | 6        | 0.8                    |
| ZF(OCT4-r1777)        | agTATCCTGAGGCTCATGCTgctggtct        | 6        | 0.9                    |
| ZF(OCT4-r1712)        | gtGGAGGGGTGCAGGAAGGCtgcctaa         | 6        | 1.1                    |
| ZF(OCT4-r1690)        | caGAGGAGGTGGCGAGTGATtgtggag         | 6        | 1.3                    |
| ZF(OCT4-r1391)        | ctTGAATGGGCCTGGATGGCtcccctgg        | 6        | 2.5                    |
| ZF(OCT4-r1307)        | ggGGAAGGGGGCAGgACAATGgccttgg        | 6        | 0.8                    |
| ZF(OCT4-r1301)        | nnACTGGGGGAAGGGGGCAGgacaatgg        | 6        | 1.1                    |
| ZF(OCT4-r1243)        | agGGGGTGGGGGGTGTGGAGaaaaaata        | 6        | 7.6                    |
| ZF(OCT4-r601)         | nnTCAGGAACCCAGGTGcttgaccctt         | 5        | 0.8                    |
| ZF(OCT4-r151)         | nnGGGGAAAACCGGGAGacacaactggc        | 5        | 1.0                    |
| ZF(OCT4+r59)          | ccGCCATGGGGAAGGAAGGCgccccaaag       | 6        | 1.6                    |
| ZF(OCT4+r92)          | ggGGCGAGAAGGCAaAATCTGaagccag        | 6        | 1.5                    |
| ZF(OCT4+r99)          | ncTGGAGGgGGCGAGAAGGCAaaaactg        | 6        | 0.9                    |
| ZF(OCT4+r101)         | caCCTGGAGGGGGCGAGAAGgcgaaatc        | 6        | 3.1                    |
| ZF(OCT4+r136)         | gcCCGGCTCCGGCCCCCTGgcccattca        | 6        | 1.3                    |
| <b>ZF(OCT4+r253)</b>  | <b>atACGGCGGGGGGCATGGGGaatcccc</b>  | <b>6</b> | <b>68.1</b>            |
| ZF(OCT4+r414)         | gcACCAGGGGTGACGGTGCAGggctccg        | 6        | 27.2                   |

Supplementary Table 2. ZF-TFs for SOX2

| Name                 | Target Site                         | Fingers  | SOX2 activation (Fold) |
|----------------------|-------------------------------------|----------|------------------------|
| ZF (SOX2-387)        | ccTTAGCTGCTtCCCGCGtcccatcctc        | 5        | 1.4                    |
| ZF (SOX2-r414)       | ggGGTGGGGCAGGGcACAGTGgggtggct       | 6        | 1.3                    |
| ZF (SOX2-r405)       | aaGGTGCGGGGGTGGGGCAGggcacagt        | 6        | 1.2                    |
| ZF (SOX2-r400)       | caGCTAAGGTGCGGGGGTGGggcagggc        | 6        | 1.2                    |
| ZF (SOX2-r394)       | ggGAAGCAGCTAAGGTGCGGgggtgggg        | 6        | 1.5                    |
| ZF (SOX2-r385)       | gaTGGGACGCGGGAaGCAGCTaagtgct        | 6        | 1.2                    |
| ZF (SOX2-r379)       | agGATGGGACGCGGGAAGcagctaaggt        | 5        | 1.6                    |
| ZF (SOX2-r379)       | atGAGGATGGGACGCGGGAAGcagctaa        | 6        | 1.2                    |
| ZF (SOX2-378)        | taAATGAGgATGGGAcGCGGGAagcagc        | 6        | 1.2                    |
| ZF (SOX2-273)        | ccTTCGAAAAGgCGTGTGgtgtgacctg        | 5        | 1.1                    |
| ZF (SOX2-270)        | tcGAAAAGgCGTGTGgTGTGACctgttg        | 6        | 1.3                    |
| ZF (SOX2-266)        | aaAGGCGTGTGgTGTGACctgttgctgc        | 5        | 1.1                    |
| ZF (SOX2-260)        | gtGTGGTGTgACCTGTTGCTGcgagagg        | 6        | 0.9                    |
| ZF (SOX2-253)        | gtGACCTGTTGCTGCGAGAGgggataca        | 6        | 1.3                    |
| ZF (SOX2-251)        | gaCCTGTTGCTGCGAGAGGGgatacaaa        | 6        | 1.1                    |
| ZF (SOX2-245)        | ttGCTGCGAGAGGGGATacaaagtttc         | 5        | 1.5                    |
| ZF (SOX2-218)        | ctCAGTGGCTGGCAGGCTGGctctggga        | 6        | 1.2                    |
| ZF (SOX2-215)        | agTGGCTGgCAGGCTgGCTCTGggagcc        | 6        | 1.2                    |
| ZF (SOX2-211)        | gcTGGCAGgCTGGCTCTGGGAgcctcct        | 6        | 1.5                    |
| ZF (SOX2-r307)       | acTAAGACTACGTGGGTtttttttctt         | 5        | 1.2                    |
| ZF (SOX2-r298)       | agTGGGTAAcACAGCAcTAAGACtacgtg       | 6        | 1.4                    |
| ZF (SOX2-r273)       | ccACACGCCTTTTCGAaggaagtgggta        | 5        | 1.1                    |
| ZF (SOX2-r253)       | tcTCGCAGCAACAGGTCacaccacacgc        | 5        | 1.3                    |
| ZF (SOX2-r252)       | ctCTCGCAGCAACAGGTCacaccacacgc       | 5        | 1.1                    |
| ZF (SOX2-146)        | ccGCGCGGCCGGCGCGCGGgaggcccc         | 6        | 2.0                    |
| ZF (SOX2-140)        | ggCCGCGCGCGCGGGAGGCCccgcccc         | 6        | 1.0                    |
| ZF (SOX2-111)        | ttCATGCAaAACCCGGCAGCGaggctgg        | 6        | 1.1                    |
| ZF (SOX2-r198)       | gaGGGGGAGGAGGCTCCAGagccagcc         | 6        | 1.4                    |
| ZF (SOX2-r192)       | ggCGAGGAGGGGGAGGAGGctccagag         | 6        | 1.5                    |
| ZF (SOX2-r184)       | agGGGGCAGGCGAGGAGGGGgaggaggc        | 6        | 2.4                    |
| ZF (SOX2-r181)       | agGAGGGGGCAGGCGAGGAGggggagga        | 6        | 2.2                    |
| ZF (SOX2-r178)       | ggGAGGAGGGGGCAGGCGAGgggggga         | 6        | 2.1                    |
| ZF (SOX2-r171)       | naGGCCGgGGAGGAGGGGGCaggcgag         | 6        | 1.3                    |
| ZF (SOX2-r168)       | ggGAGGCcGGGGGAGGAGGggcaggc          | 6        | 1.3                    |
| ZF (SOX2-r155)       | cgCCGCGCGCGCGGgGGAGGCcggggga        | 6        | 1.8                    |
| ZF (SOX2-r148)       | ccGCGCCGCGCGCGCGCGGgggagggc         | 6        | 1.2                    |
| ZF (SOX2-r139)       | gcGGGGCCtCCCGCGCCCGGgcccgcgc        | 6        | 1.2                    |
| ZF (SOX2-r131)       | gaAAGGGGGCGGGGcCTCCCgcccgc          | 6        | 1.2                    |
| ZF (SOX2-r123)       | ttTGCATGAAAGGGGGCGGGgcctccc         | 6        | 1.2                    |
| ZF (SOX2-98)         | cgGCAGCGAGGCTGGGCTCGagtggagg        | 6        | 2.6                    |
| ZF (SOX2-92)         | cgAGGCTGGGCTCGAGTGAaggagccgc        | 6        | 1.6                    |
| <b>ZF (SOX2-88)</b>  | <b>gcTGGGCTCGAGTGGAGGAGccgccgcg</b> | <b>6</b> | <b>2.3</b>             |
| ZF (SOX2-84)         | ggCTCGAGtGGAGGAGCCgccgcgcct         | 5        | 1.9                    |
| ZF (SOX2-76)         | tgGAGGAGCCGCCGCGCGCTgattggtc        | 6        | 1.5                    |
| ZF (SOX2-64)         | cgCGCGCTGATTGGTCGctagaaacca         | 5        | 1.2                    |
| ZF (SOX2-58)         | ctGATTGGTCGCTAGAAaccatttatt         | 5        | 1.4                    |
| ZF (SOX2-9)          | ggATGGTTGTctATTAACttgttcaaaa        | 5        | 1.3                    |
| ZF (SOX2-r109)       | cgCTGCCGGGTTTTGCAtgaaagggggc        | 5        | 1.6                    |
| <b>ZF (SOX2-r51)</b> | <b>atAAATGGGTTtCTAGCGaccaatcagc</b> | <b>5</b> | <b>2.0</b>             |
| ZF (SOX2-r40)        | ggGGGCTGTcAGGGAaTAAATGggtttc        | 6        | 1.7                    |
| ZF (SOX2-r31)        | atGTGACGGGGGCTGTCAGGgaataaat        | 6        | 1.5                    |
| ZF (SOX2+27)         | caGGAGTTGTCAAGGCAGAGaagagagt        | 6        | 1.3                    |

|                |                              |   |     |
|----------------|------------------------------|---|-----|
| ZF (SOX2+37)   | caAGGCAGaGAAGAGAGTGTtgcaaaa  | 6 | 1.2 |
| ZF (SOX2+48)   | agAGAGTGTGGCAAAGGGggaaagta   | 6 | 1.6 |
| ZF (SOX2+58)   | tgCAAAGGGGGAAaGTAGTTtgctgcc  | 6 | 1.2 |
| ZF (SOX2+64)   | agGGGGAAaGTAGTTtGCTGCCtcttta | 6 | 1.9 |
| ZF (SOX2+88)   | ttTAAGACTAGGACTGAGAGaaagaaga | 6 | 1.4 |
| ZF (SOX2+92)   | agACTAGGACTGAGAGAAAGaagaggag | 6 | 1.6 |
| ZF (SOX2-r3)   | ttTTTGAACAAGTTaATAGACaaccatc | 6 | 1.3 |
| ZF (SOX2+132)  | ggAGAGAAgTTTGAGCCCCAGgcttaag | 6 | 1.2 |
| ZF (SOX2+186)  | caTCGGCGGCGGCAGGAnnnnnnnnnn  | 5 | 1.3 |
| ZF (SOX2+r144) | gaAAGGCTTAAGCCTGGGGCtcaaactt | 6 | 1.9 |
| ZF (SOX2+r150) | ttTTTGAAAGGCTTAAGCCtggggctc  | 6 | 1.1 |
| ZF (SOX2+r178) | cgCCGCCGATGATTGTTattattattt  | 5 | 1.3 |

**Supplementary Table 3.** ZF-TFs for KLF4

| Name                  | Target Site                         | Fingers  | KLF4 activation (Fold) |
|-----------------------|-------------------------------------|----------|------------------------|
| ZF (KLF4-698)         | ttGAGGCTcCCAGTTCACGCTgcacagt        | 6        | 1.2                    |
| ZF (KLF4-698)         | tcCCAGTTCACGCTGCACAGtgctgggc        | 6        | 1.6                    |
| ZF (KLF4-627)         | ctCAGCAGaAGGGCCCGCAGGaacctgt        | 6        | 1.3                    |
| ZF (KLF4-620)         | gaAGGGCCCGCAGGAAACCGtgcgaggt        | 6        | 1.5                    |
| ZF (KLF4-614)         | ccCGCGAGGAACCGTGCAGGtgcaggcc        | 6        | 1.5                    |
| ZF (KLF4-608)         | agGAACCGTGCAGAGTCCAGGccgagcgc       | 6        | 1.3                    |
| ZF (KLF4-574)         | cgCCACCGGCACTGGCGCTGagcgacga        | 6        | 2.0                    |
| ZF (KLF4-568)         | cgGCACTGGCGCTGAGCGACgagagcgg        | 6        | 2.6                    |
| ZF (KLF4-556)         | tgAGCGACGAGAGCGGActcctgagc          | 5        | 1.1                    |
| ZF (KLF4-547)         | agAGCGGACTCCTGCGAGCGcagagagg        | 6        | 1.2                    |
| ZF (KLF4-507)         | gaGGGCTGGATGAGtCACGCGgataatc        | 6        | 1.1                    |
| ZF (KLF4-455)         | gcGCGGCAAGCGCGTATGCTagcagggg        | 6        | 1.2                    |
| ZF (KLF4-449)         | caAGCGCGTATGCTAGCAGGggtgcgga        | 6        | 1.3                    |
| ZF (KLF4-446)         | gcGCGTATGCTAGCAGGggtgcgacgc         | 5        | 1.0                    |
| ZF (KLF4-443)         | cgTATGCTAGCAGGGGTGCGgacgcgtg        | 6        | 1.1                    |
| ZF (KLF4-437)         | ctAGCAGGGGTGCGGACGCGtgaccgtg        | 6        | 1.8                    |
| ZF (KLF4-380)         | gcTTCGAACCCAGGGAGCCGacaatggc        | 6        | 1.2                    |
| ZF (KLF4-375)         | gaACCCAGGGAGCCgACAATGgcggtga        | 6        | 1.6                    |
| ZF (KLF4-375)         | ccCAGGGAGCCGACAATGGCggtgagta        | 6        | 1.4                    |
| ZF (KLF4-368)         | ggGAGCCGACAATGGCGGTGagtacggc        | 6        | 1.1                    |
| ZF (KLF4-366)         | gaGCCGACAATGGCGGTGAGtacggccc        | 6        | 0.9                    |
| ZF (KLF4-362)         | cgACAATGGCGGTGAGTACGgccctggt        | 6        | 1.5                    |
| ZF (KLF4-136)         | taGCTGCCATAGCAACGATGgaagggag        | 6        | 0.9                    |
| ZF (KLF4-130)         | ccATAGCAACGATGGAAGGgagcctcgg        | 6        | 1.1                    |
| ZF (KLF4-122)         | acGATGGAAGGGAGcCTCGGGggggggcg       | 6        | 2.9                    |
| ZF (KLF4-114)         | agGGAGCCTCGGGGGGGCGgagagaag         | 6        | 1.1                    |
| ZF (KLF4-109)         | gcCTCGGGGGGGGGCGGAGAGaagaaagg       | 6        | 1.0                    |
| ZF (KLF4-49)          | agGCTGTAGCGAAGGAAGTTataagtaa        | 6        | 1.3                    |
| ZF (KLF4-16)          | gcGCGCCGGCGGCCgGCAGTTtcccgac        | 6        | 1.6                    |
| ZF (KLF4-3)           | cgGCAGTTTCCCGACCAGAGagaacgaa        | 6        | 1.0                    |
| ZF(KLF4+17)           | agAGAACGAACGTGTCTGCGggcgcgcg        | 6        | 1.1                    |
| ZF (KLF4+23)          | cgAACGTGTCTGCGGGCGCGcggggagc        | 6        | 1.7                    |
| ZF (KLF4+29)          | tgTCTGCGGGCGCGGGGAgcagaggc          | 6        | 2.3                    |
| ZF (KLF4+76)          | acCGGGAGCCGCGAGTGACcctcccc          | 6        | 1.5                    |
| <b>ZF (KLF4+134)</b>  | <b>ccGTGGCCcCGCCCATGGCCgcgcgcg</b>  | <b>6</b> | <b>6.5</b>             |
| ZF (KLF4-r750)        | caGGCGGAAAGAGGCACGAAtggggagt        | 6        | 1.5                    |
| <b>ZF (KLF4-r739)</b> | <b>ttCCGCCGgGAACAGGCGGAaagaggca</b> | <b>6</b> | <b>3.1</b>             |
| ZF (KLF4-r716)        | nnAGAAGGCCAGAGGAGtggtccgccc         | 5        | 0.8                    |
| ZF (KLF4-r696)        | gtGCAGCGtGAACTGGGAGCCtcaagag        | 6        | 1.4                    |
| ZF (KLF4-r666)        | nnGGAGAGGAGGCAGTGcccagcactgt        | 5        | 1.3                    |
| ZF (KLF4-r587)        | ccGGTGGCGGTGCCGGCGCTcggcctga        | 6        | 1.6                    |
| ZF (KLF4-r576)        | caGCGCCAGTGCCGGTGGCGgtgccggc        | 6        | 1.1                    |
| ZF (KLF4-r545)        | tcTGCCTCGCAGGAGTCCGctctctgc         | 6        | 1.1                    |
| ZF (KLF4-r543)        | tcTCTGCGCTCGCAGGAGTCCgctctcg        | 6        | 1.1                    |
| ZF (KLF4-r482)        | gcGCGCTGGAGAAGAGCGCGattatccg        | 6        | 2.7                    |
| ZF (KLF4-r447)        | caCCCCTGCTAGCATACGCGcttgccgc        | 6        | 0.8                    |
| ZF (KLF4-r423)        | gcGGGCGGCACGGTCACGCGtccgcacc        | 6        | 1.2                    |
| ZF (KLF4-r412)        | ctGGTGGGgTCAGCGGGCGGCacgggtca       | 6        | 1.6                    |
| ZF (KLF4-r406)        | gaAGACTGGTGGGGTCAGCGggcggcac        | 6        | 0.8                    |
| ZF (KLF4-r344)        | cgGTCGCTgCGCGACCAGGGCcgctactc       | 6        | 0.8                    |
| ZF (KLF4-r326)        | ggAACCGGGCGCAGGTTCCGtgctgctg        | 6        | 1.1                    |
| ZF (KLF4-r320)        | ncGCGAGGAACCGGGCGCAGgttcggtc        | 6        | 1.2                    |

|                |                               |   |     |
|----------------|-------------------------------|---|-----|
| ZF (KLF4-r319) | nnCGCGAGGAACCGGGCGCAggttcggt  | 6 | 1.5 |
| ZF (KLF4-r21)  | ngCCGGCCgCCGGCGCGCGTTccttact  | 6 | 1.8 |
| ZF (KLF4+r80)  | ggGAGGGTCACTCGGCGGCTcccgggtgc | 6 | 0.5 |
| ZF (KLF4+r127) | tgGGCGCGgGCCACGGGCGGGtgggagg  | 6 | 1.6 |
| ZF (KLF4+r131) | ccATGGGCGCGGGCCACGGGcgggtggg  | 6 | 1.6 |
| ZF (KLF4+r133) | nnCCATGGGCGCGGGCCACGggcgggtg  | 6 | 1.2 |
| ZF (KLF4+r156) | ggTGAGTTGTGTGGAGCGCGcgcgccca  | 6 | 1.0 |
| ZF (KLF4+r162) | ggACTCCGgTGAGTTGTGTGGagcgcg   | 6 | 1.6 |
| ZF (KLF4+r175) | ggCGCAAGGCGCGGACTCCGgtgagttg  | 6 | 2.3 |

Supplementary Table 4. ZF-TFs for MYC

| Name                 | Target Site                          | Fingers  | c-myc activation (Fold) |
|----------------------|--------------------------------------|----------|-------------------------|
| ZF (c-myc-797)       | ccCGCACGGGGCCCCACGGAagcctgag         | 6        | 0.9                     |
| ZF (c-myc-784)       | ccACGGAAgCCTGAGCAGGCCgggcagg         | 6        | 1.0                     |
| ZF (c-myc-765)       | cgGGGCAGGAGGGGcGGTATCtctgct          | 6        | 1.1                     |
| ZF (c-myc-758)       | ggAGGGCCGGTATCtGCTGCTttggcag         | 6        | 1.1                     |
| ZF (c-myc-752)       | gcGGTATCtGCTGCTTTGGCAgcaaatt         | 6        | 1.2                     |
| ZF (c-myc-729)       | aaATTGGGgGACTCAGTCTGGgtggaag         | 6        | 0.9                     |
| ZF (c-myc-709)       | ggTGGAAAGgTATCCAATCCAGatagctg        | 6        | 0.9                     |
| ZF (c-myc-694)       | atCCAGATaGCTGTGCATACAtaatgca         | 6        | 0.9                     |
| ZF (c-myc-604)       | acGTGGCAaTGCGTTGCTGGGtattttt         | 6        | 1.0                     |
| ZF (c-myc-409)       | caGCCTGGTACGCGcGTGGCGtggcggg         | 6        | 1.1                     |
| ZF (c-myc-403)       | ggTACGCGcGTGGCGTGGCGtgggccc          | 6        | 0.9                     |
| ZF (c-myc-323)       | tcACAGGACAAGGAtGCGGTTtgtcaaa         | 6        | 0.9                     |
| ZF (c-myc-295)       | caGTACTGcTACGGAGGAGCAgcagaga         | 6        | 1.1                     |
| ZF (c-myc-244)       | caAAAGAAaATGGTAGGCGCGcgtagtt         | 6        | 1.3                     |
| ZF (c-myc-237)       | aaATGGTAGGCGCGcGTAGTTaattcat         | 6        | 1.3                     |
| ZF (c-myc-184)       | ctAGAGCTAGAGTgCtCGGCTgcccggc         | 6        | 1.4                     |
| ZF (c-myc-24)        | aaTGCGAGGGTCTGGACGGCtgaggacc         | 6        | 1.9                     |
| ZF (c-myc-23)        | atGCGAGGGTCTGGACGGCTgaggacc          | 6        | 2.1                     |
| <b>ZF (c-myc-18)</b> | <b>agGGTCTGGACGGCTGAGGAcccccagag</b> | <b>6</b> | <b>2.4</b>              |
| <b>ZF (c-myc-17)</b> | <b>ggGTCTGGACGGCTGAGGACccccgagc</b>  | <b>6</b> | <b>2.6</b>              |
| ZF (c-myc-4)         | tgAGGACCCCCGAGcTGTGCTgctcgg          | 6        | 2.1                     |
| ZF (c-myc+97)        | ttGGCGGGA AAAAGAACGGAgggagggga       | 6        | 1.0                     |
| ZF (c-myc+110)       | gaACGGAGGGAGGGATCGCGctgagtat         | 6        | 2.0                     |
| ZF (c-myc+112)       | acGGAGGGAGGGATCGCGCTgagtataa         | 6        | 1.3                     |
| ZF (c-myc+118)       | ggAGGGATCGCGCTGAGTATAaaagccg         | 6        | 0.8                     |
| ZF (c-myc+135)       | taTAAAAGCCGTTTTTCGGGgctttatc         | 6        | 1.3                     |
| ZF (c-myc+138)       | aaAAGCCGTTTTTCGGGgctttatctaa         | 5        | 0.9                     |
| ZF (c-myc+141)       | agCCGTTTTTCGGGGCTttatctaactc         | 5        | 1.4                     |
| ZF (c-myc-r801)      | cgTGGGGCCCCGTGCGGGAGnnnnnnnn         | 6        | 1.6                     |
| ZF (c-myc-r753)      | tgCCAAAGCAGCAGATACCGcccctcct         | 6        | 0.7                     |
| ZF (c-myc-r663)      | caTTTGTTGGGGGgAGTCATGtattatg         | 6        | 1.0                     |
| ZF (c-myc-r603)      | taACCCAGcAACGCATTGCCAcgtatac         | 6        | 0.9                     |
| ZF (c-myc-r555)      | ggAATGATaGAGGCATAAGGAggaaaac         | 6        | 0.8                     |
| ZF (c-myc-r549)      | atAGGGAGgAATGATaGAGGCAtaagga         | 6        | 0.9                     |
| ZF (c-myc-r535)      | gaTGTTAGtGTAGATAGGGAGgaatgat         | 6        | 1.1                     |
| ZF (c-myc-r529)      | gcGTGGGATGTTAGtGTAGATaggagg          | 6        | 0.9                     |
| ZF (c-myc-r520)      | nnGTTcAGaGCGTGGGATGTTagtgtag         | 6        | 1.3                     |
| ZF (c-myc-r517)      | cgCGCGTtCAGAGCGTGGGATgttagtg         | 6        | 0.9                     |
| ZF (c-myc-r513)      | tgGGCGCGcGTTcAGAGCGTGggatggt         | 6        | 1.1                     |
| ZF (c-myc-r511)      | taATGGGCgCGCGTtCAGAGCGtgggat         | 6        | 1.1                     |
| ZF (c-myc-r504)      | atTAATGGGCGCGCGTtCagagcgtggg         | 5        | 1.6                     |
| ZF (c-myc-r498)      | aaGGGTATTAATGGGCGcgcggtcagag         | 5        | 1.0                     |
| ZF (c-myc-r416)      | nnTACCAGGCTGCAGGGcgcctcgctaa         | 5        | 1.0                     |
| ZF (c-myc-r216)      | nnAGAGAGCCGCATGAAttaactacg           | 5        | 0.9                     |
| ZF (c-myc-r216)      | agAGTAAGAGAGCCgCATGAAttaacta         | 6        | 1.4                     |
| ZF (c-myc-r194)      | ctCTAGCTcTAGGATGTAAACagagtaa         | 6        | 1.1                     |
| ZF (c-myc-r186)      | gcCGAGCACTCTAGCTCTAGgatgtaaa         | 6        | 1.2                     |
| ZF (c-myc-r170)      | naGACTCAGCCGGGCAGCCGagcactct         | 6        | 1.3                     |
| ZF (c-myc-r124)      | ggAGGGGCgCTTATGGGGAGGgtgggga         | 6        | 1.4                     |
| ZF (c-myc-r120)      | ncGGGAGGGGCGCTTATGGGgaggggtg         | 6        | 1.5                     |
| ZF (c-myc-r120)      | nnCGGGAGgGGCGCTTATGGGgaggggtg        | 6        | 1.8                     |
| ZF (c-myc-r118)      | aaCCCGGGAGGGGCgCTTATGgggaggg         | 6        | 1.0                     |

|                |                              |   |     |
|----------------|------------------------------|---|-----|
| ZF (c-myc-r59) | ggGCGGAGaTTAGCGAGAGAGgatctt  | 6 | 1.0 |
| ZF (c-myc-r58) | tgGGCGGAGATTAGCGAGAGaggatctt | 6 | 1.0 |
| ZF (c-myc-r44) | ttATAAAGGGCCGGTGGGCGgagattag | 6 | 0.8 |

Supplementary Table 5. ZF-TFs for miR302/367

| Name                   | target site                         | Fingers  | miR302 activation (Fold) |
|------------------------|-------------------------------------|----------|--------------------------|
| ZF(miR302-r391)        | agATTGCTTCCACGgGGTGTtttgttct        | 6        | 0.4                      |
| ZF(miR302-r349)        | tgTTTGAAGAAGCAtcTACATGttaa          | 6        | 1.0                      |
| ZF(miR302-347)         | acAGAGTTcCTCCAGATAGAAacaca          | 6        | 1.4                      |
| ZF(miR302-r310)        | gaGCCGAGaAAGGCAtGTGTtctatc          | 6        | 1.5                      |
| ZF(miR302-r272)        | tgATGGCAtaGATTAGGGTAACaatgag        | 6        | 0.5                      |
| <b>ZF(miR302-r270)</b> | <b>ttTGATGGcATAGATtAGGGTAacaatg</b> | <b>6</b> | <b>2.2</b>               |
| ZF(miR302-224)         | ttTAAGAGGAAGATatCTTGTGgtaatg        | 6        | 1.3                      |
| <b>ZF(miR302-218)</b>  | <b>agGAAGATatCTTGTGGTAATGgtttta</b> | <b>6</b> | <b>8.7</b>               |
| ZF(miR302-209)         | tcTTGTGGtaATGGTTTTAGCTgttaac        | 6        | 1.0                      |
| ZF(miR302-r175)        | caGATGTCAATGTTaACAGCTaaaacca        | 6        | 0.9                      |
| ZF(miR302-153)         | aaAAAGGAtCCAGACccACCCAGgatca        | 6        | 2.1                      |
| ZF(miR302+8)           | nnTCTGGAGGAGAACACGAAtctttggg        | 6        | 2.1                      |
| ZF(miR302+r11)         | tcCAGAAGggTAAAAGGCAGGGacttca        | 6        | 3.5                      |
| ZF(miR302+r14)         | tcCTCCAGaAGGGTAaAAGGCAGggact        | 6        | 2.3                      |
| ZF(miR302+r108)        | atTTAGAGcTGAGGAgAAAGAAaacaaa        | 6        | 1.0                      |
| ZF(miR302+129)         | aaGTTGTATGTTGGGTGGGctcccttca        | 6        | 1.2                      |
| ZF(miR302+162)         | aaCATGGAAGTGCTtTCTGTGactttaa        | 6        | 0.6                      |
| ZF(miR302+r167)        | ctTCCATGtAAAGTTGAAGGGagccca         | 6        | 0.8                      |
| ZF(miR302+201)         | tcCATGTTtTAGTAGgAGTGAatccaat        | 6        | 1.2                      |
| ZF(miR302+267)         | ggGATCCCcTTTGCTtAACATGgggggt        | 6        | 0.8                      |
| ZF(miR302+274)         | ccTTTGCTtAACATGGGGGTAcctgct         | 6        | 1.2                      |
| ZF(miR302+279)         | gcTTTAACATGGGGgTACCTGctgtgtg        | 6        | 0.8                      |
| ZF(miR302+282)         | ttAACATGGGGGTAcCTGCTGtgtgaaa        | 6        | 3.4                      |
| ZF(miR302+r359)        | aaGGTGTGCTGGCTtGGAGACacctcca        | 6        | 0.9                      |
| ZF(miR302+r447)        | gaGCCCAGtCTTGGAAaAAAGTTagaatc       | 6        | 0.4                      |
| ZF(miR302+r454)        | tgGTGGGGaGCCCAGtCTTGGAAaaaagt       | 6        | 1.4                      |
| ZF(miR302+459)         | ntTAAACGTGGATGTACTTGctttgaaa        | 6        | 0.7                      |
| ZF(miR302+r468)        | caTCCACGTTTAAAGTGGTGGggagccca       | 6        | 1.4                      |
| ZF(miR302+r488)        | ctTTAGTTtCAAAGCAAGTACatccacg        | 6        | 1.2                      |
| ZF(miR302+488)         | taAAGAAGtaAGTGCTTCCATGttttgg        | 6        | 0.4                      |
| ZF(miR302+496)         | taAGTGCTtcCATGTTTTGGTGatggta        | 6        | 0.7                      |
| ZF(miR302+644)         | acATGGAGgCACTTGcTGTGACatgaca        | 6        | 1.6                      |
| ZF(miR302+647)         | tgGAGGCACtTGCTGTGACATGacaaaa        | 6        | 1.2                      |
| ZF(miR302+r732)        | tgGGCGTTAACGCAATTGCTgattaggt        | 6        | 0.5                      |
| ZF(miR302+r734)        | tgTGGGCGttAACGCAATTGCTgattag        | 6        | 0.7                      |
| ZF(miR302+736)         | acACTGTGTGCAGTtTcTTGGCTacaggc       | 6        | 0.7                      |
| ZF(miR302+r738)        | acAGTGTGGCGTTAACGCAattgctga         | 6        | 0.9                      |
| ZF(miR302+r740)        | acACAGTgtGGCGTTAACGCAattgct         | 6        | 0.3                      |
| ZF(miR302+r742)        | gcACACAGtGTGGCGTTAACgcaattg         | 6        | 1.5                      |
| ZF(miR302+743)         | gtGCAGTtTcTTGGCTaCAGGCCattact       | 6        | 0.5                      |
| ZF(miR302+750)         | tcTTGGCTaCAGGCCaTTACTGttgcta        | 6        | 0.6                      |
| ZF(miR302+r765)        | gtAATGGCCTGTAGcCAAGAActgcaca        | 6        | 1.4                      |
| ZF(miR302+819)         | caATGGTGATGGATtGTTAAGccaatga        | 6        | 1.1                      |
| ZF(miR302+1026)        | taAAAAAGcTCTCCGtTAAGACatgggg        | 6        | 1.3                      |
| ZF(miR302+1033)        | gcTCTCCGtTAAGACATGGGGctgtgaa        | 6        | 1.0                      |
| ZF(miR302+1035)        | tcTCCGTTaaGACATGGGGCTGtgaat         | 6        | 0.3                      |
| ZF(miR302+r1180)       | aaGCATCAGAAGCTtcCAAGGAaaatag        | 6        | 2.2                      |
| ZF(miR302+1218)        | ctTTTGATCGGGGAGCTAGGGattctgc        | 6        | 0.8                      |
| ZF(miR302+1221)        | ttGATCGGGGAGCTAGGGATtctgcatc        | 6        | 2.8                      |
| ZF(miR302+r1227)       | tcCCCCATCAAAAGtAAAGAAaattatt        | 6        | 2.6                      |



|                  |                               |   |     |
|------------------|-------------------------------|---|-----|
| ZF(miR302+r1234) | ccCTAGCTcCCCGATCAAAAAGtaaagaa | 6 | 0.6 |
| ZF(miR302+r1290) | ctTACCTGaAGTCAGAACAGGgaagagg  | 6 | 1.3 |
| ZF(miR302+r1309) | acAGAGTTGAAGCACTAGCTtacctga   | 6 | 4.4 |
| ZF(miR302+r1316) | aaACGGGAcAGAGTTGAAGCActagct   | 6 | 1.3 |
| ZF(miR302+r1317) | aaAACGGGAcAGAGTTGAAGCActagc   | 6 | 0.7 |
| ZF(miR302+1342)  | ctTTTGGGgtTCAGTGGACTCAatgtca  | 6 | 1.3 |
| ZF(miR302+1343)  | ttTTGGGGtTCAGTGGACTCAatgtcag  | 6 | 2.4 |
| ZF(miR302+1353)  | caGTGGACtcAATGTCAGAGCCctcaga  | 6 | 1.5 |
| ZF(miR302+r1473) | agGCCGAAtgAAAAAGGAAGACaatatc  | 6 | 1.1 |
| ZF(miR302+r1479) | gaAGAAAGGCCGAAtgAAAAAGgaagac  | 6 | 1.3 |

**Supplementary Table 6.** qPCR primers for ChIP

| Primer pair* | Forward               | Reverse                |
|--------------|-----------------------|------------------------|
| MYT          | ACTCCACCGGACTGGGACACC | GCTACCCATGAACCCCTGGGGC |
| P-2334       | CTGTGTTCACTTCTCGGCCT  | TTCCGAAGCATGTTCTCC     |
| P-1748       | GCAGAGGAGGTGGAGAGTGA  | GCACTAGACCAGCAGCATGA   |
| P-1362       | AATGGCCTTGCTGGACAAT   | AGGCCATTCAAGGGTTGAG    |
| P-1175       | CTTGCTCCCCTCTCAACCAA  | TAGGGCTGGAGGCCTGG      |
| P-834        | TCCCCGATCCATCCAGAAT   | GGCCTTGCTGGCAGTCTAC    |
| P+43         | AAGGCGAAATCCGAAGCCA   | CTTCGCAAGCCCTCATTTAC   |
| P+261        | ACTAGCCCCACTCCAACCTG  | GCTCTGAGGTGTGGGGGATT   |

\* OCT4 primer pairs are named for the midpoint of their amplicon. For example, P-2334 amplifies the sequence surrounding position -2334 relative to the TSS.

### Supplementary Figure Legends

**Supplementary Figure 1.** Results for engineered ZF-TFs targeting endogenous SOX2, KLF4, c-MYC, and miR302/367 in HEK293 cells. Procedure and designations are the same as in Figure 1. (A) SOX2, (B) KLF4, (C) c-MYC, (D) miR302/367.

**Supplementary Figure 2.** ChIP controls. (A) Western analysis was performed with protein extracts from 12-well cultures transfected in parallel with those used for FLAG-ChIP using the same anti-FLAG M2 antibody, as described in Materials and Methods. Asterisk marks ZF-TF band. (B) Positive control ChIP. Procedure was as in Figure 1B. One-third of each sheared chromatin preparation was immunoprecipitated with anti-H3K27me3 and target DNA detected by qPCR with the same primers as used for FLAG-ChIP-qPCR.

**Supplementary Figure 3.** Expression of ZF-TFs with alternative activation domains. Western analysis with anti-FLAG M2 antibody and protein extracts from HEK293 cells transfected with each of the ZF-TF constructs used in Figure 3, processed as described in Materials and Methods. Asterisks mark ZF-TF bands. Note that VP64 is a tandem repeat with 4 copies of the VP16 minimal activation domain, making VP64 a shorter peptide than VP16.

**Supplementary Figure 4.** DNase hypersensitive regions in various cell lines. DNase hypersensitivity data for OCT4 (A), SOX2 (B), KLF4 (C), c-MYC (D) and miR302/367 (E) from two embryonic stem cells and several somatic cell lines was downloaded from the UCSC Genome Browser (32,35).

**A**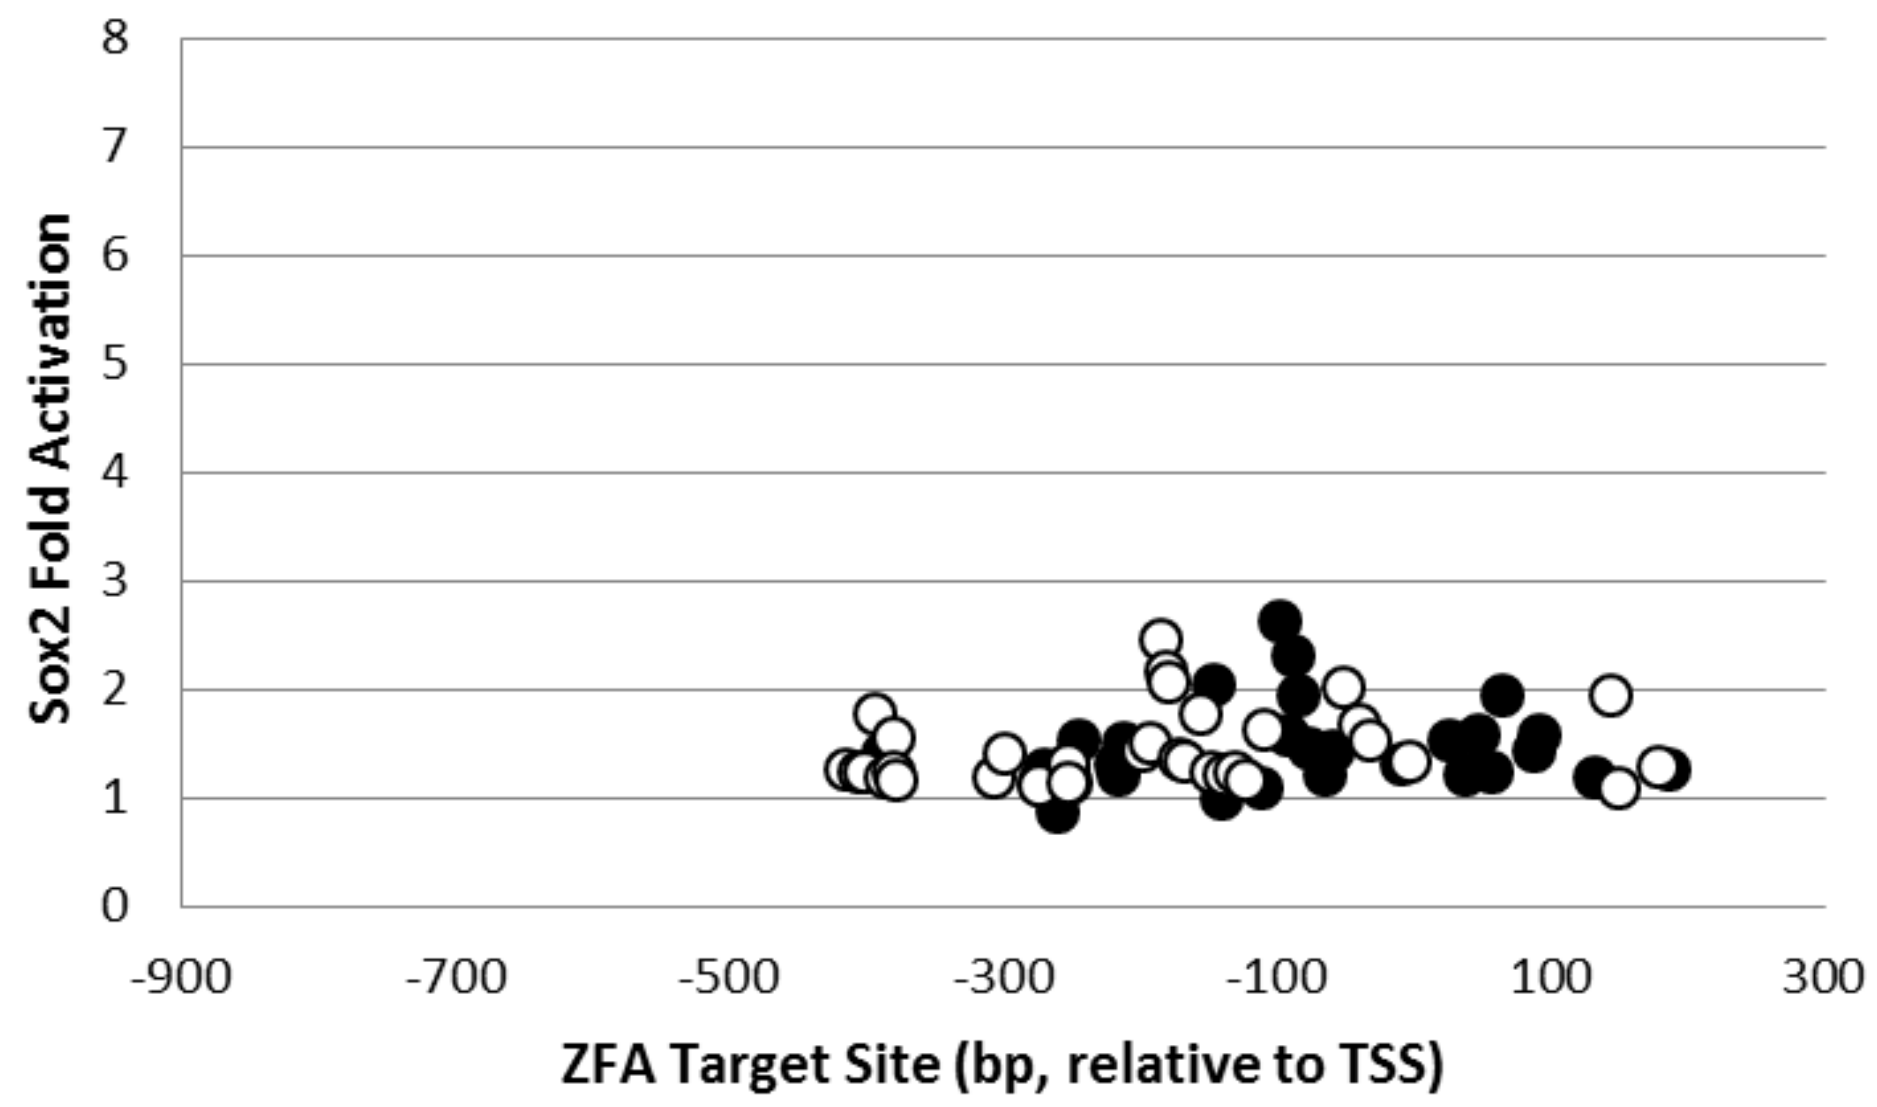**B**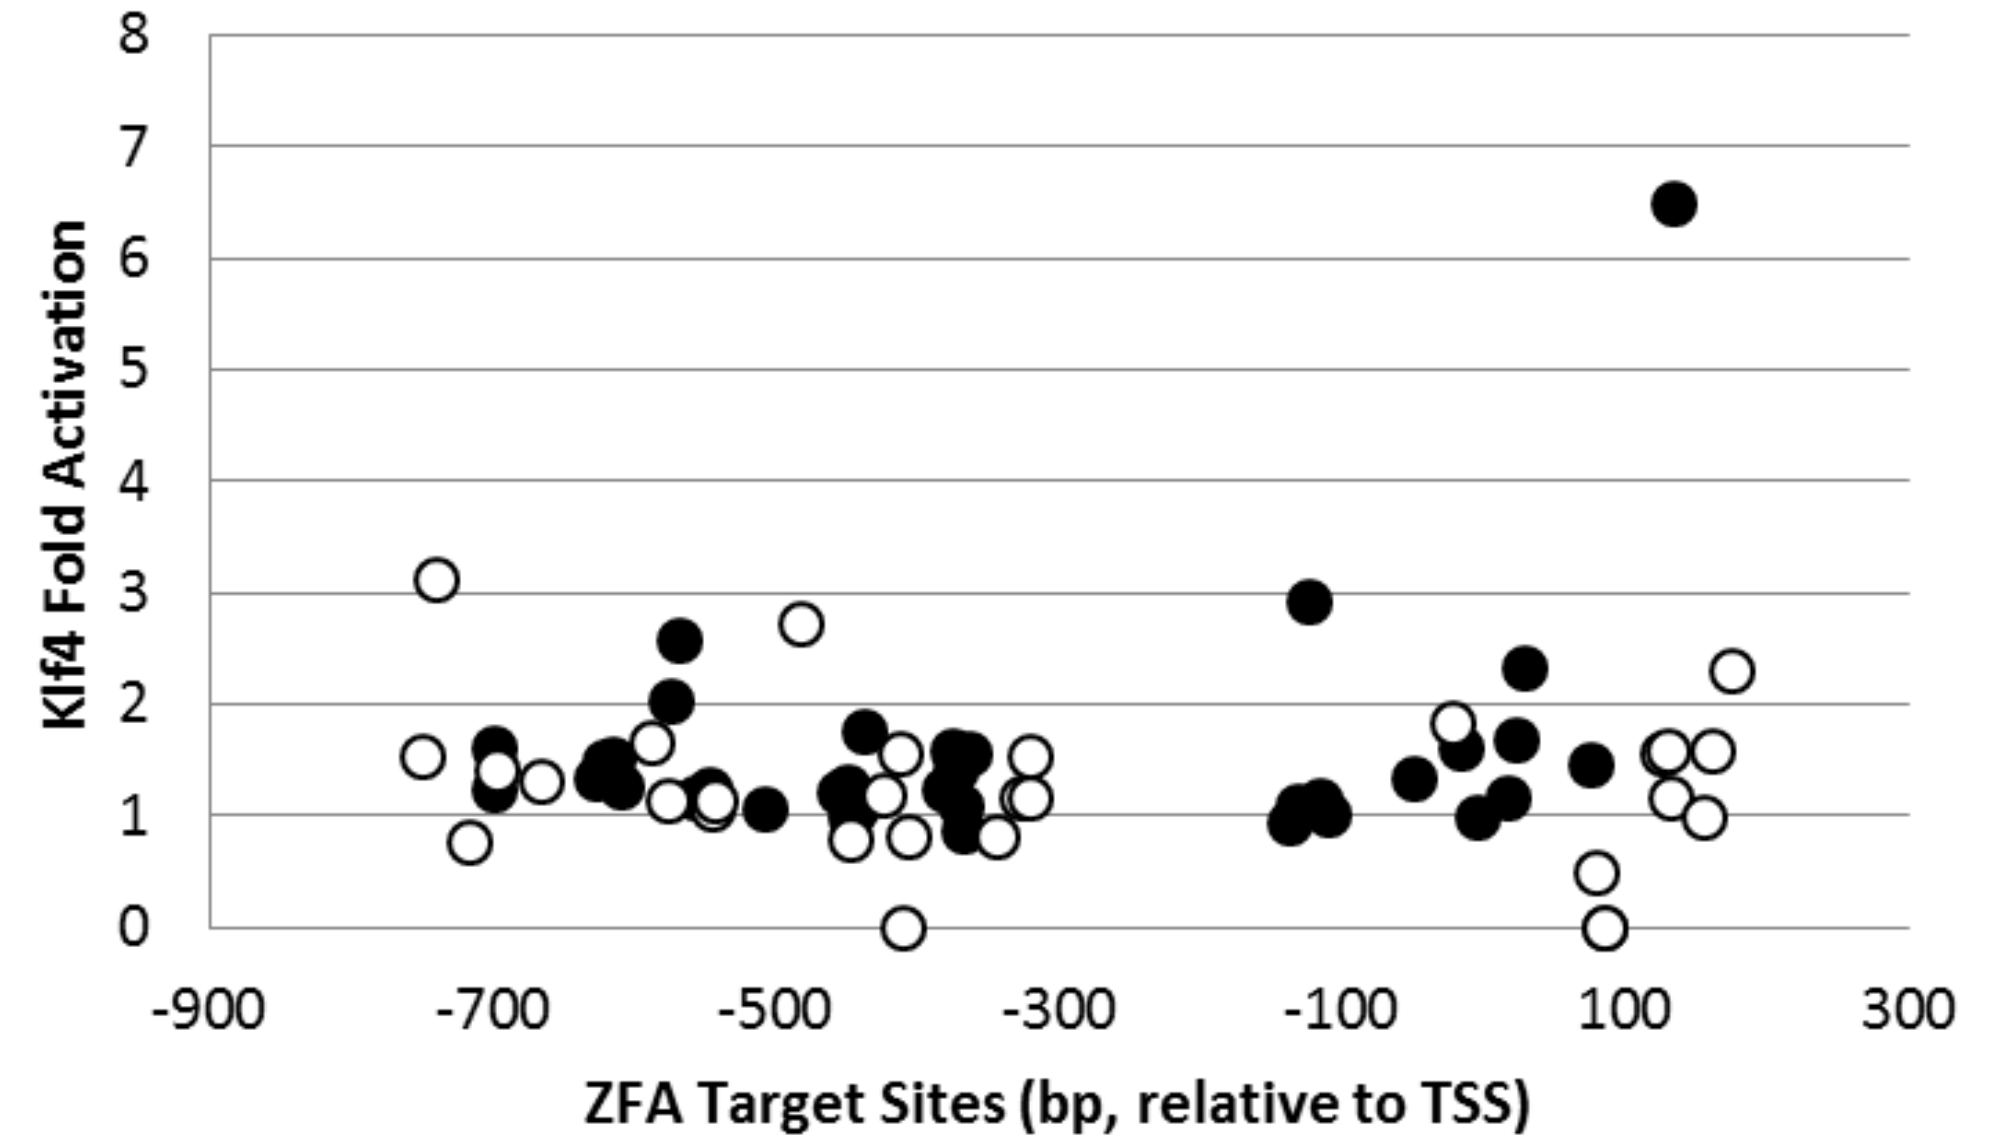**C**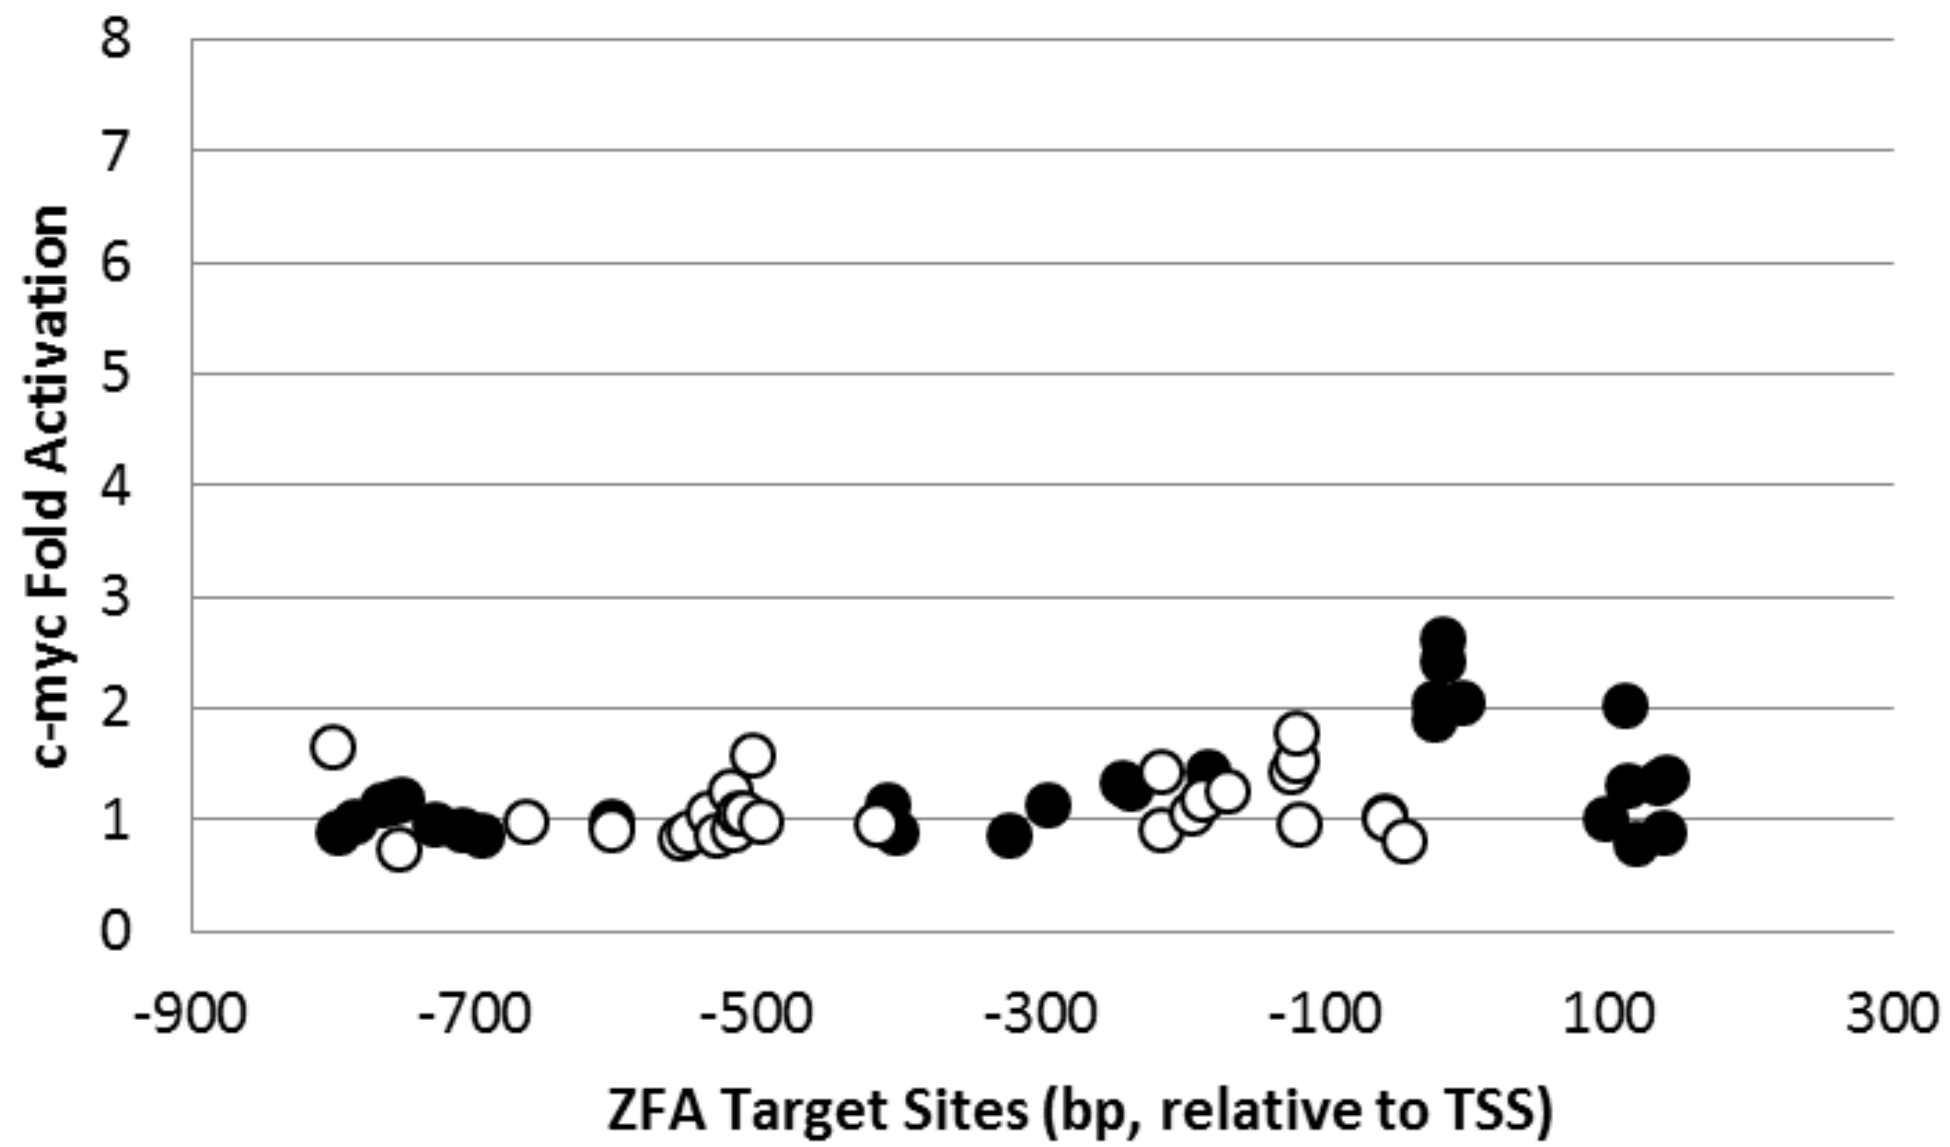**D**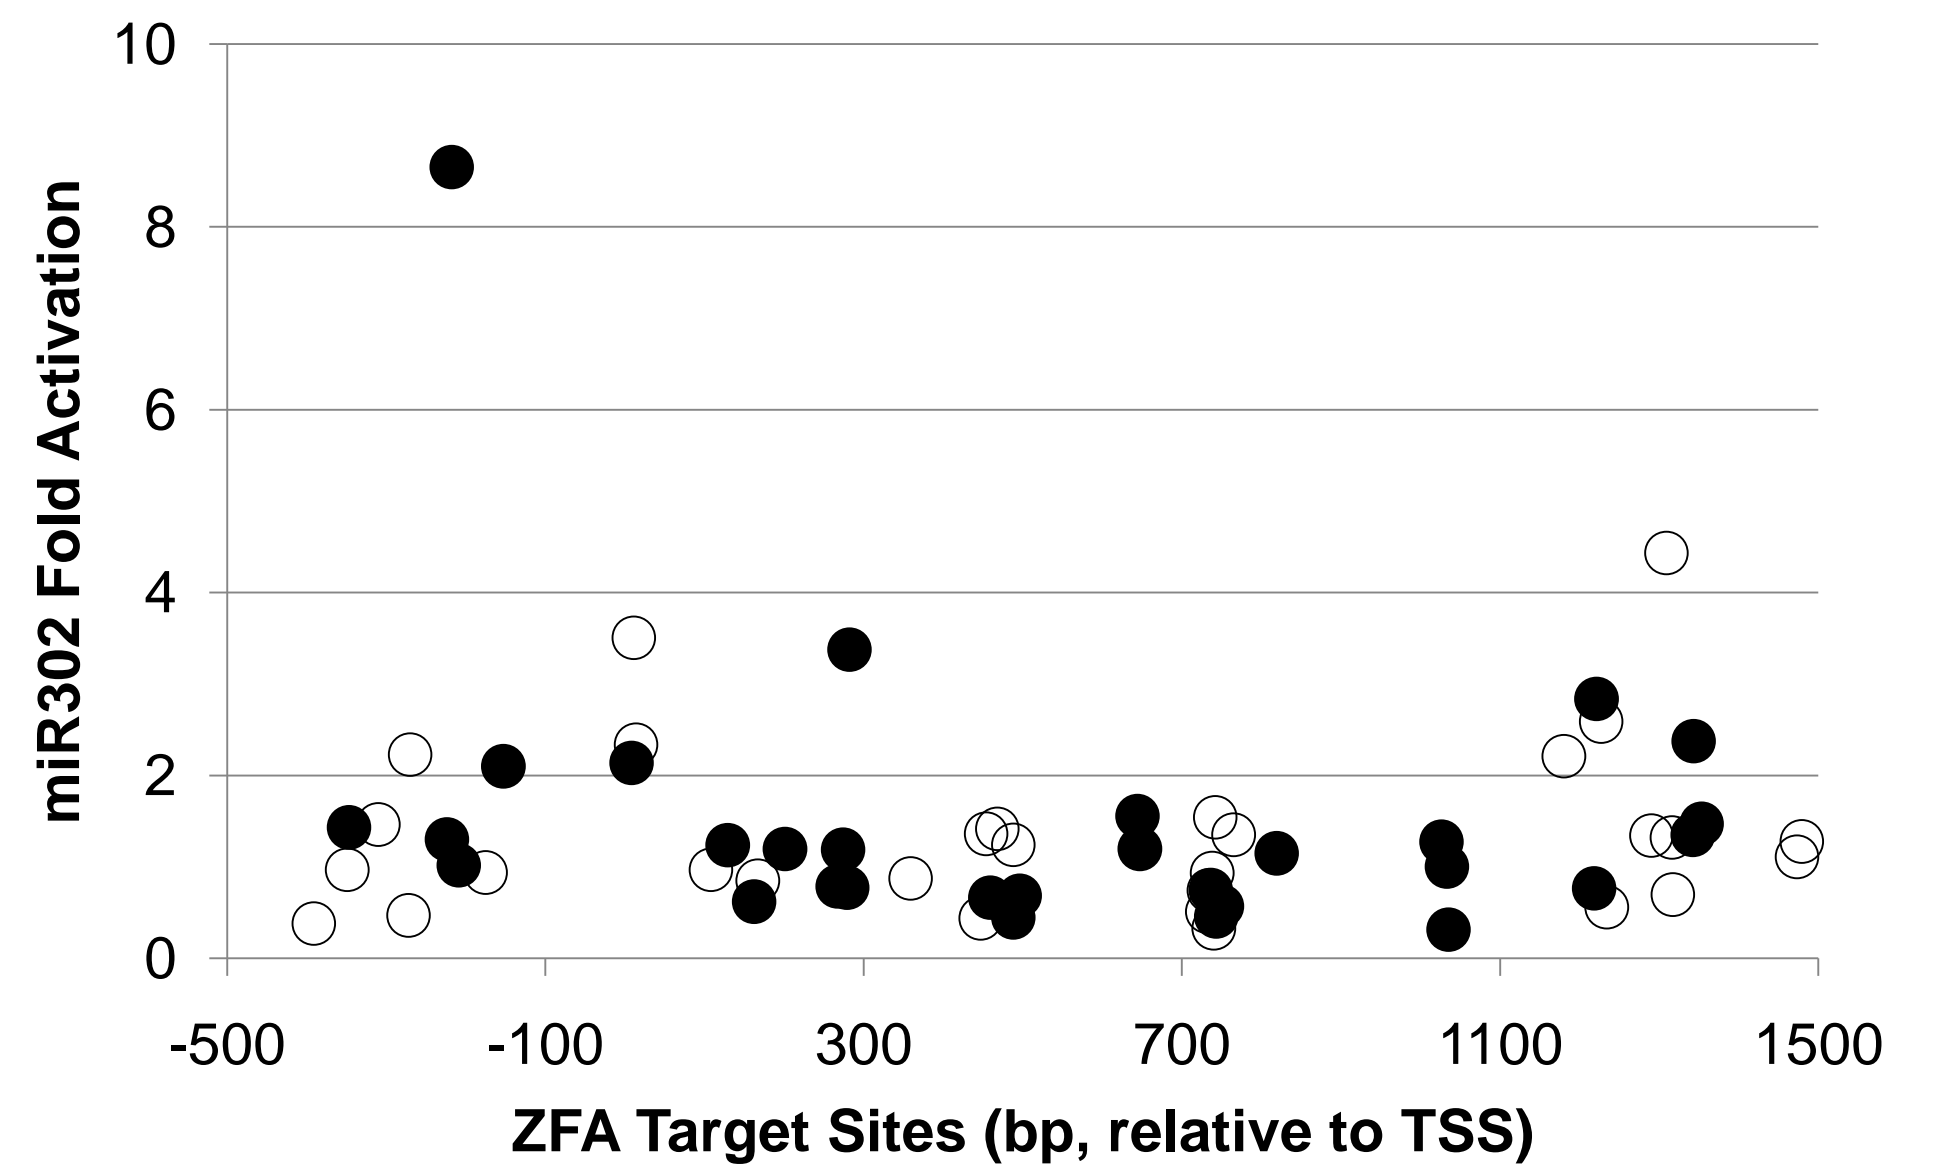

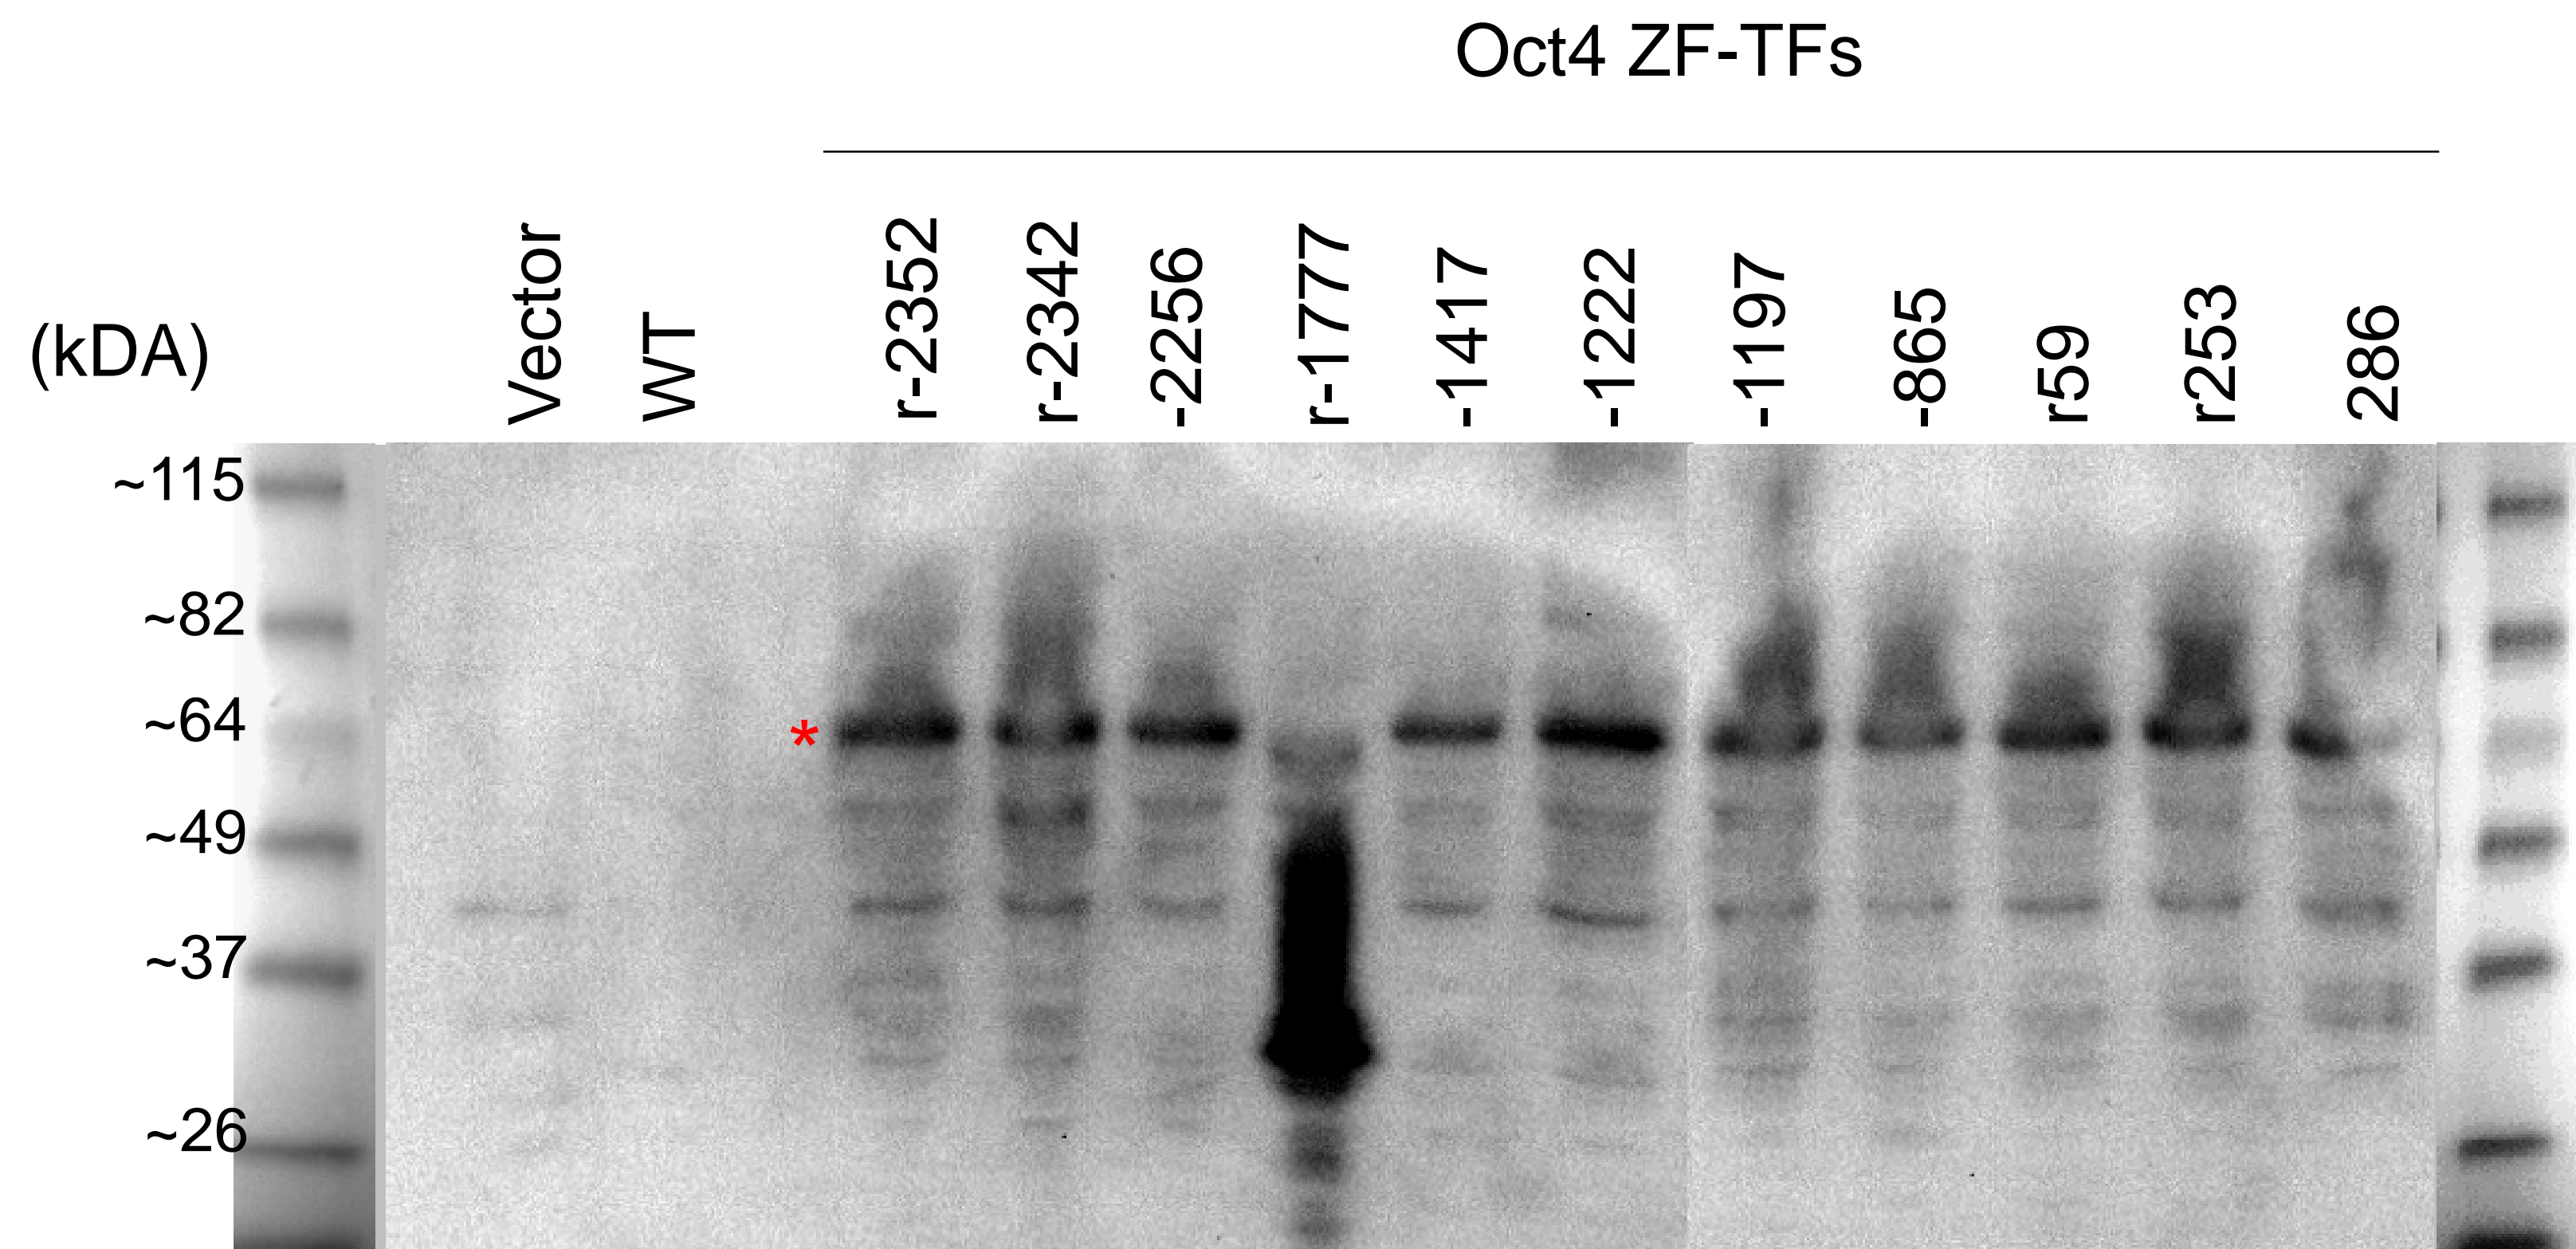

Supplementary Figure 2A

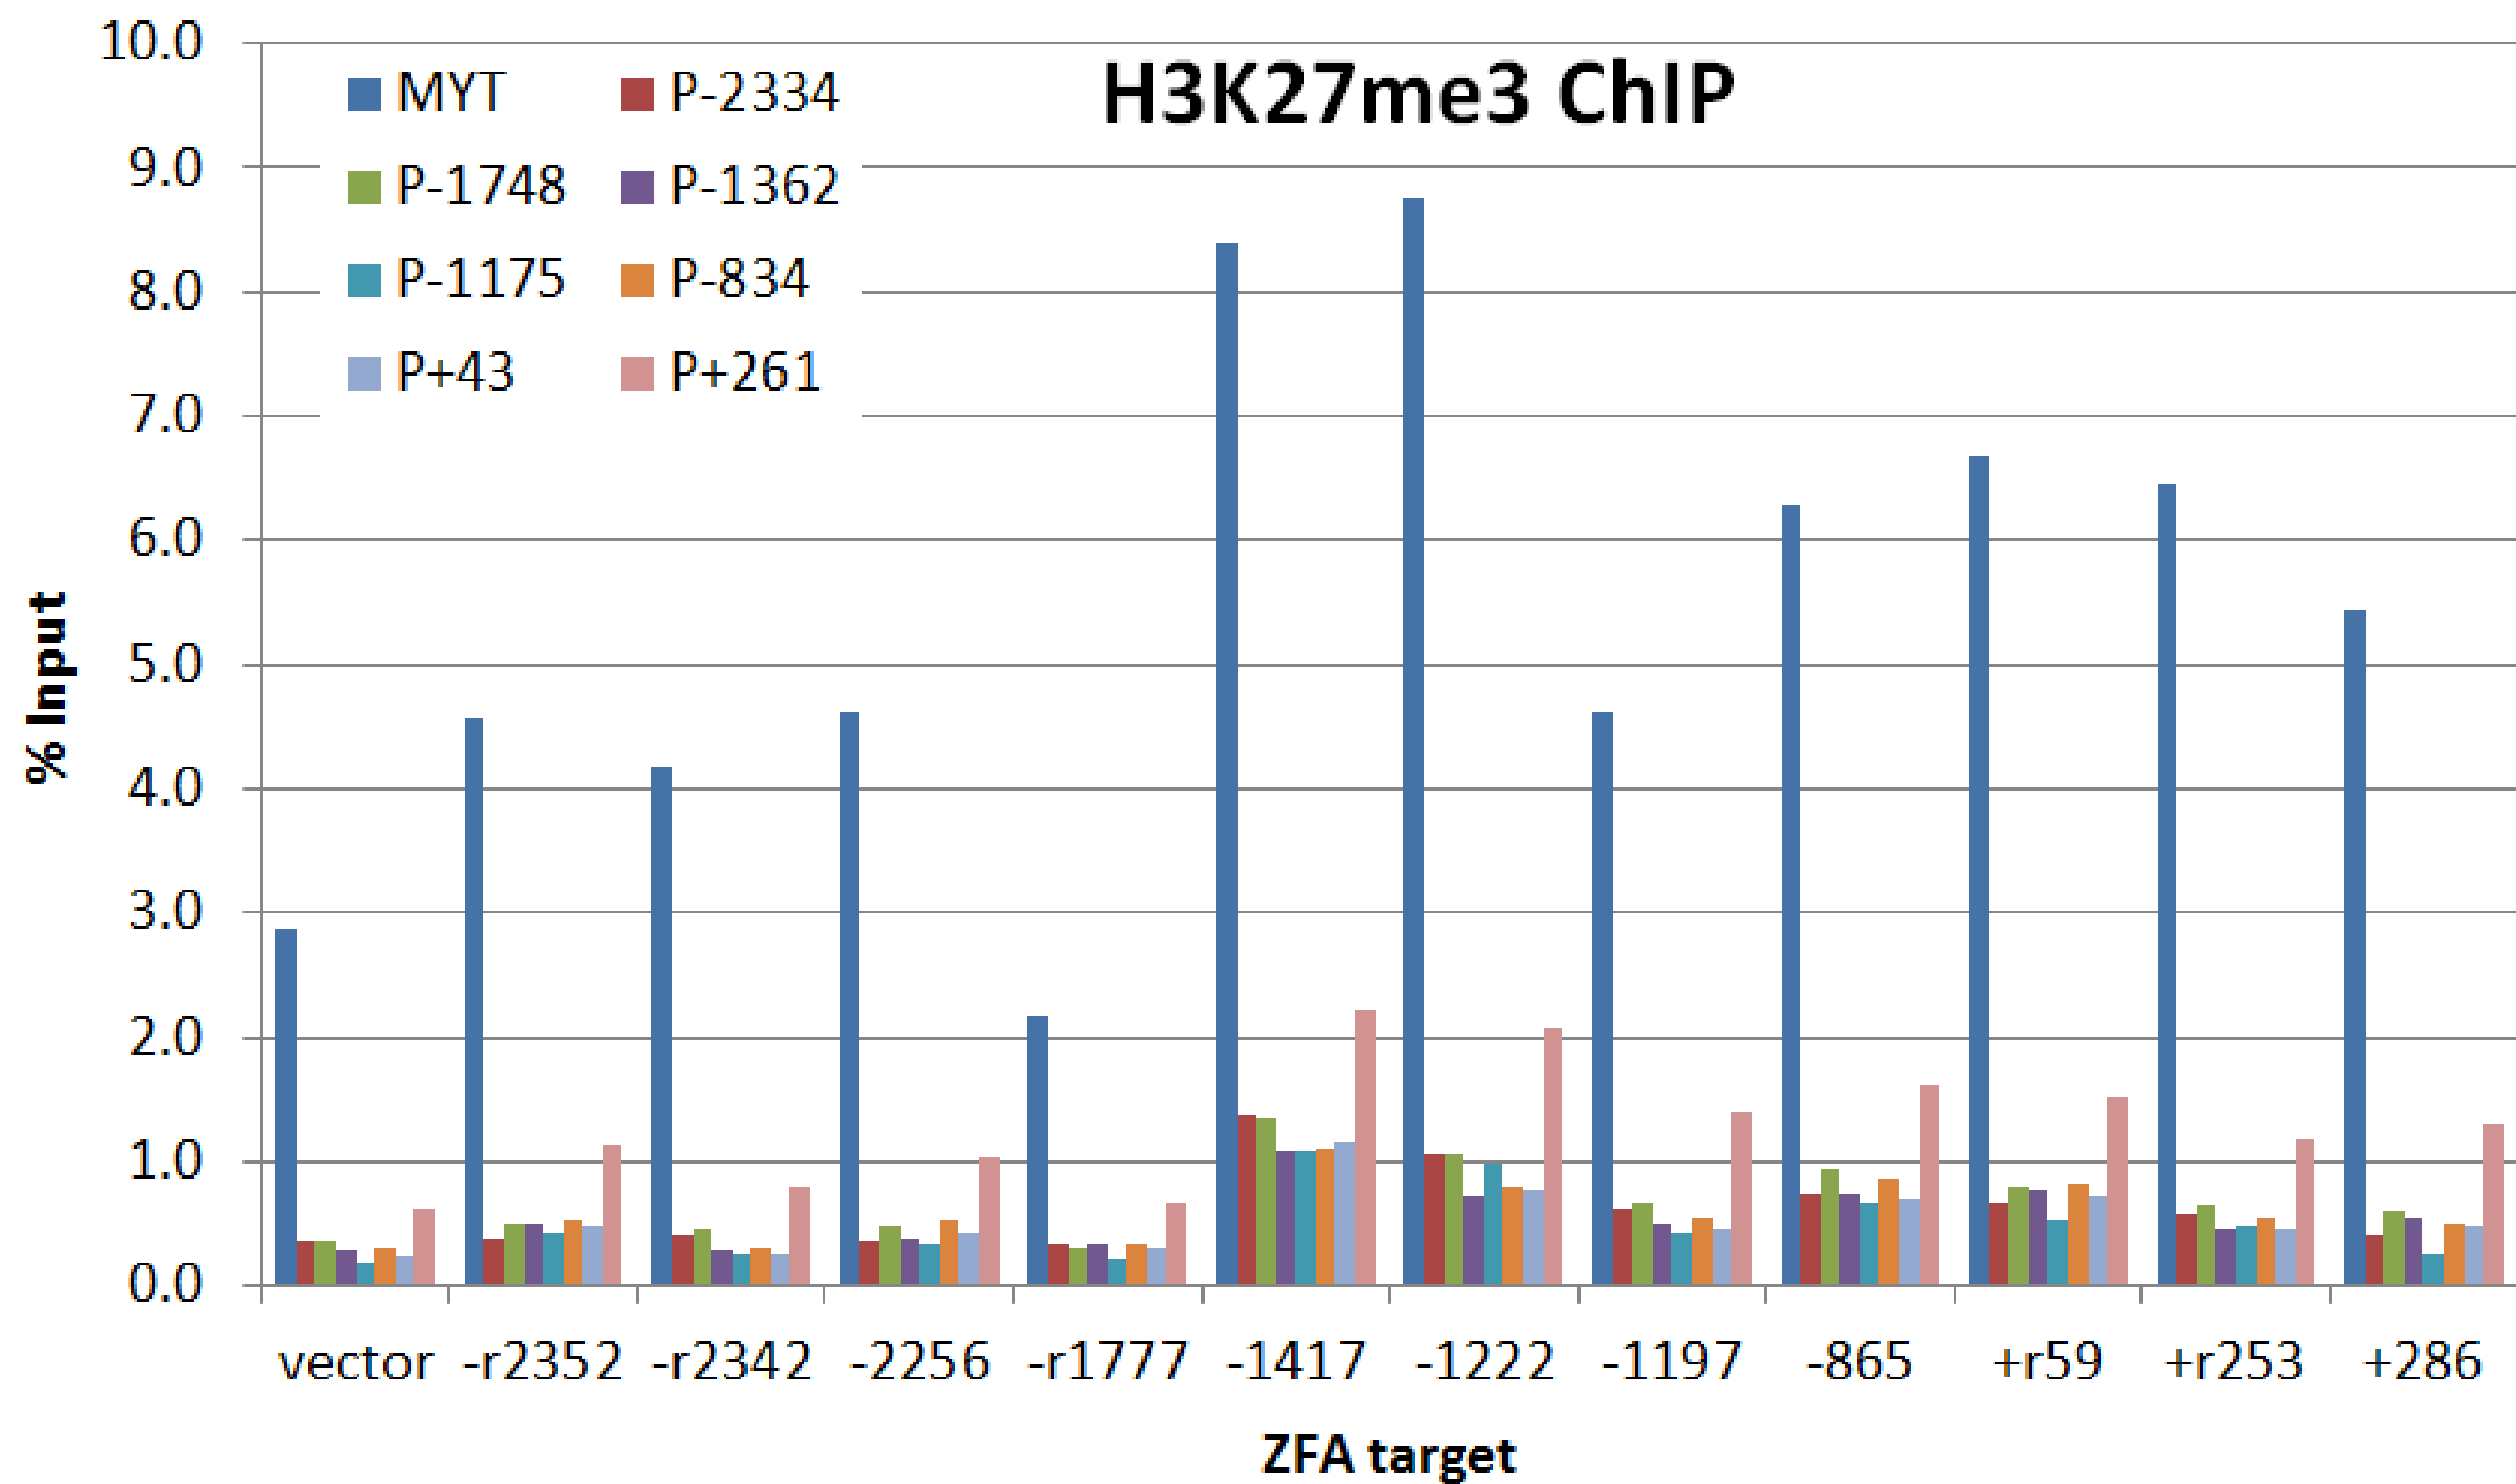

Supplementary Figure 2B

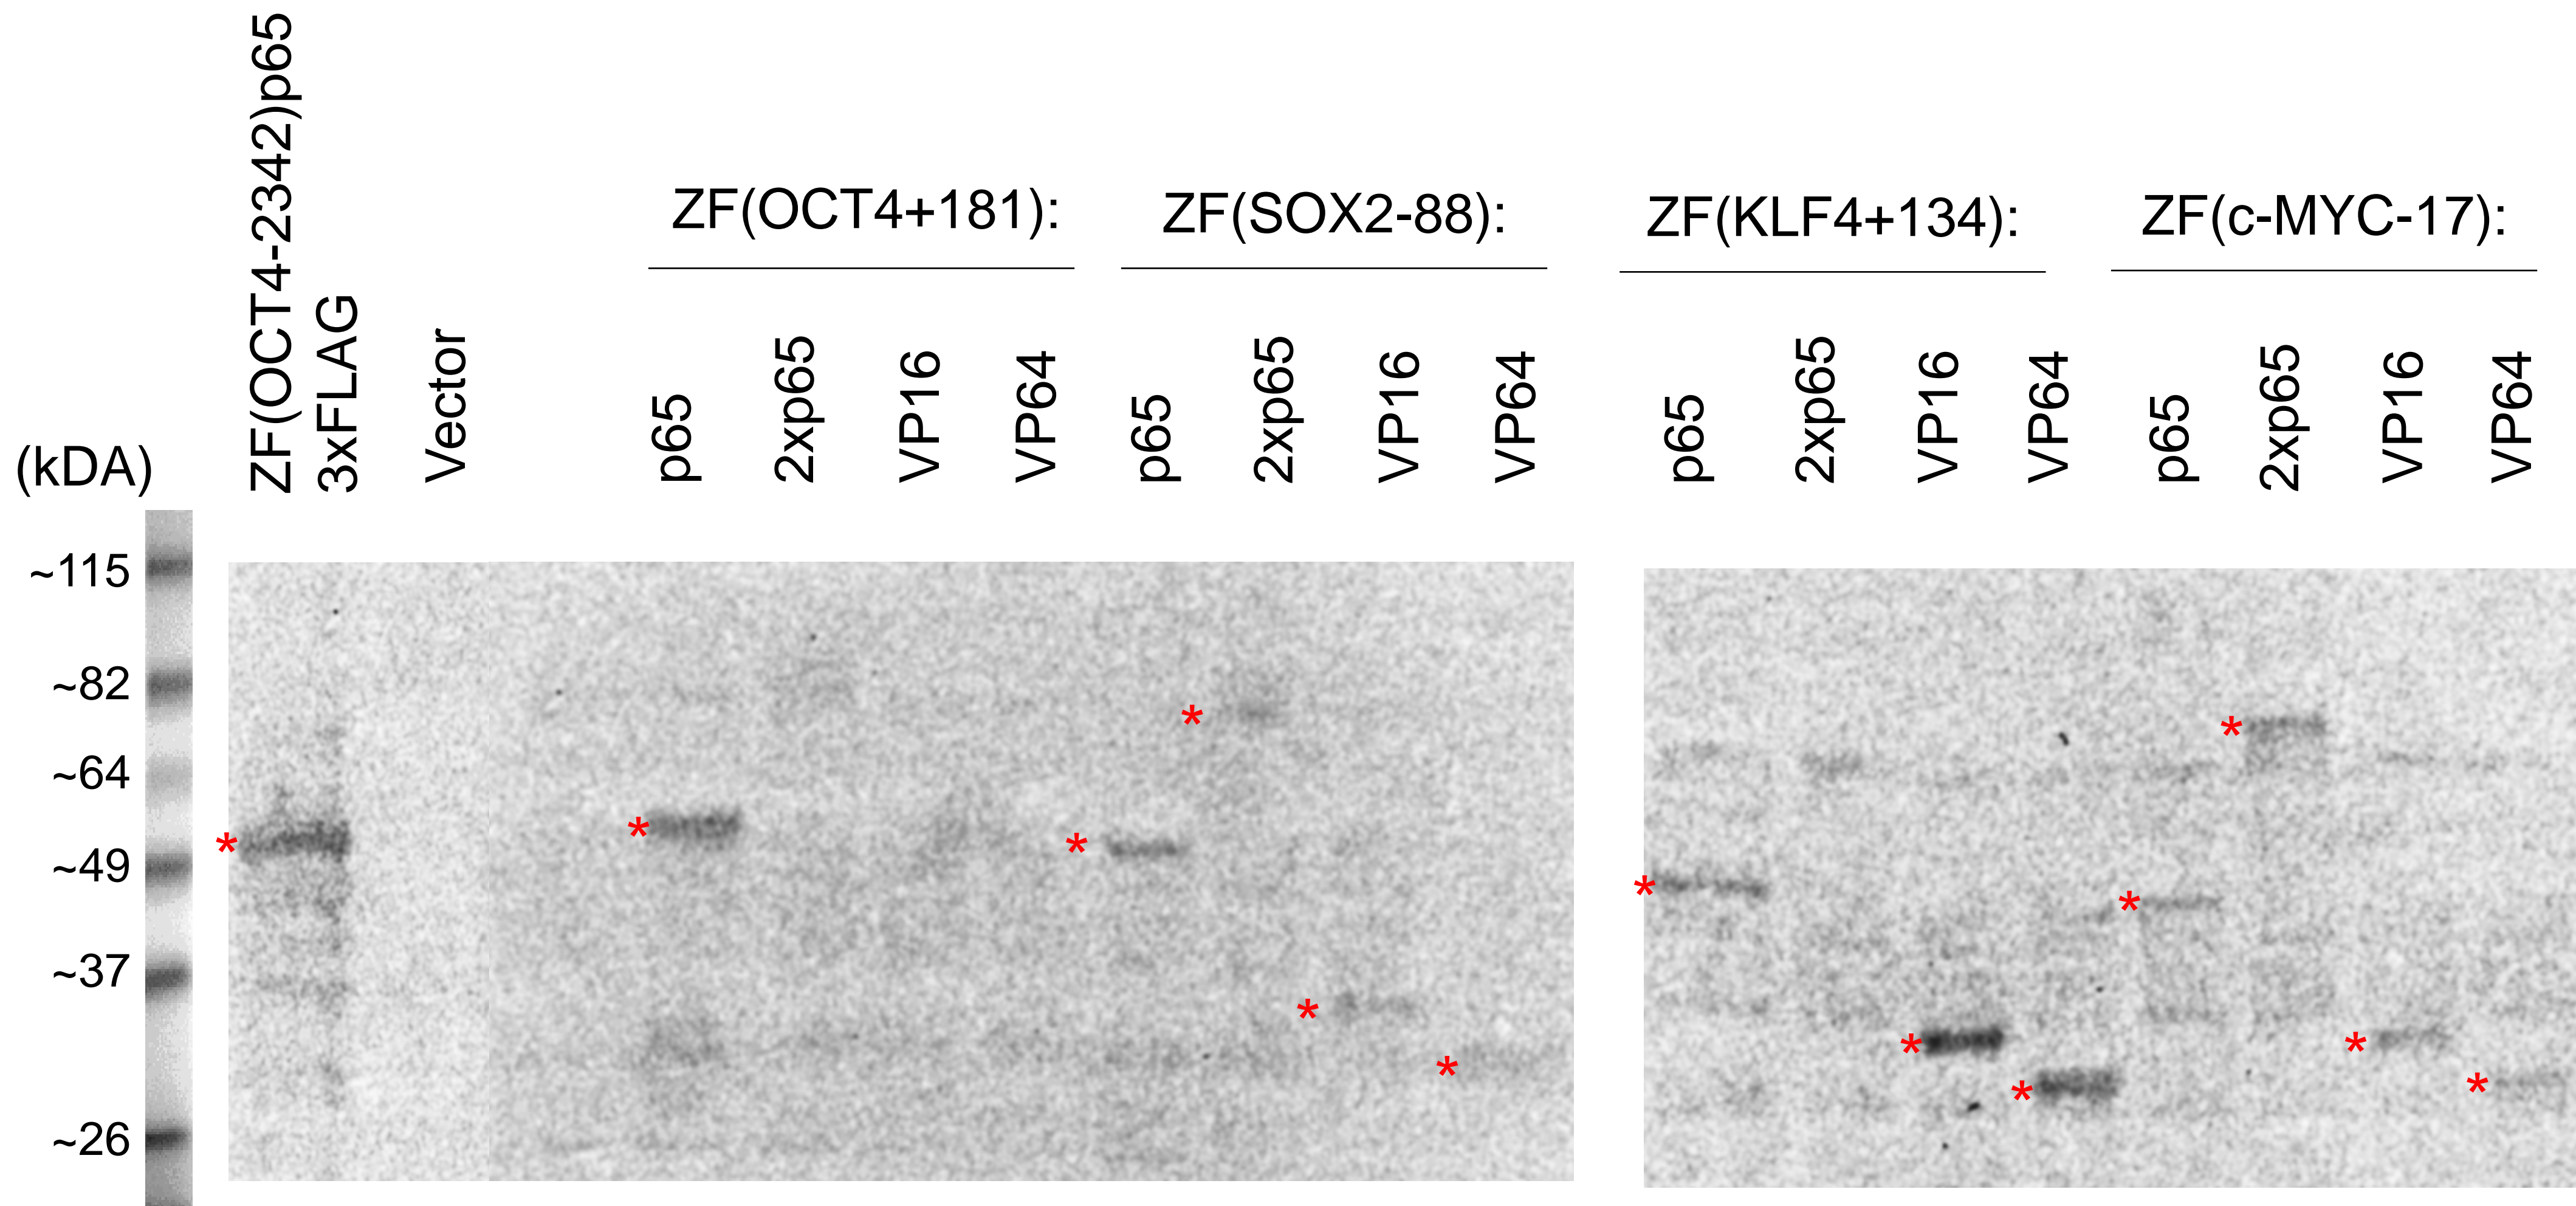

Supplementary Figure 3

A.

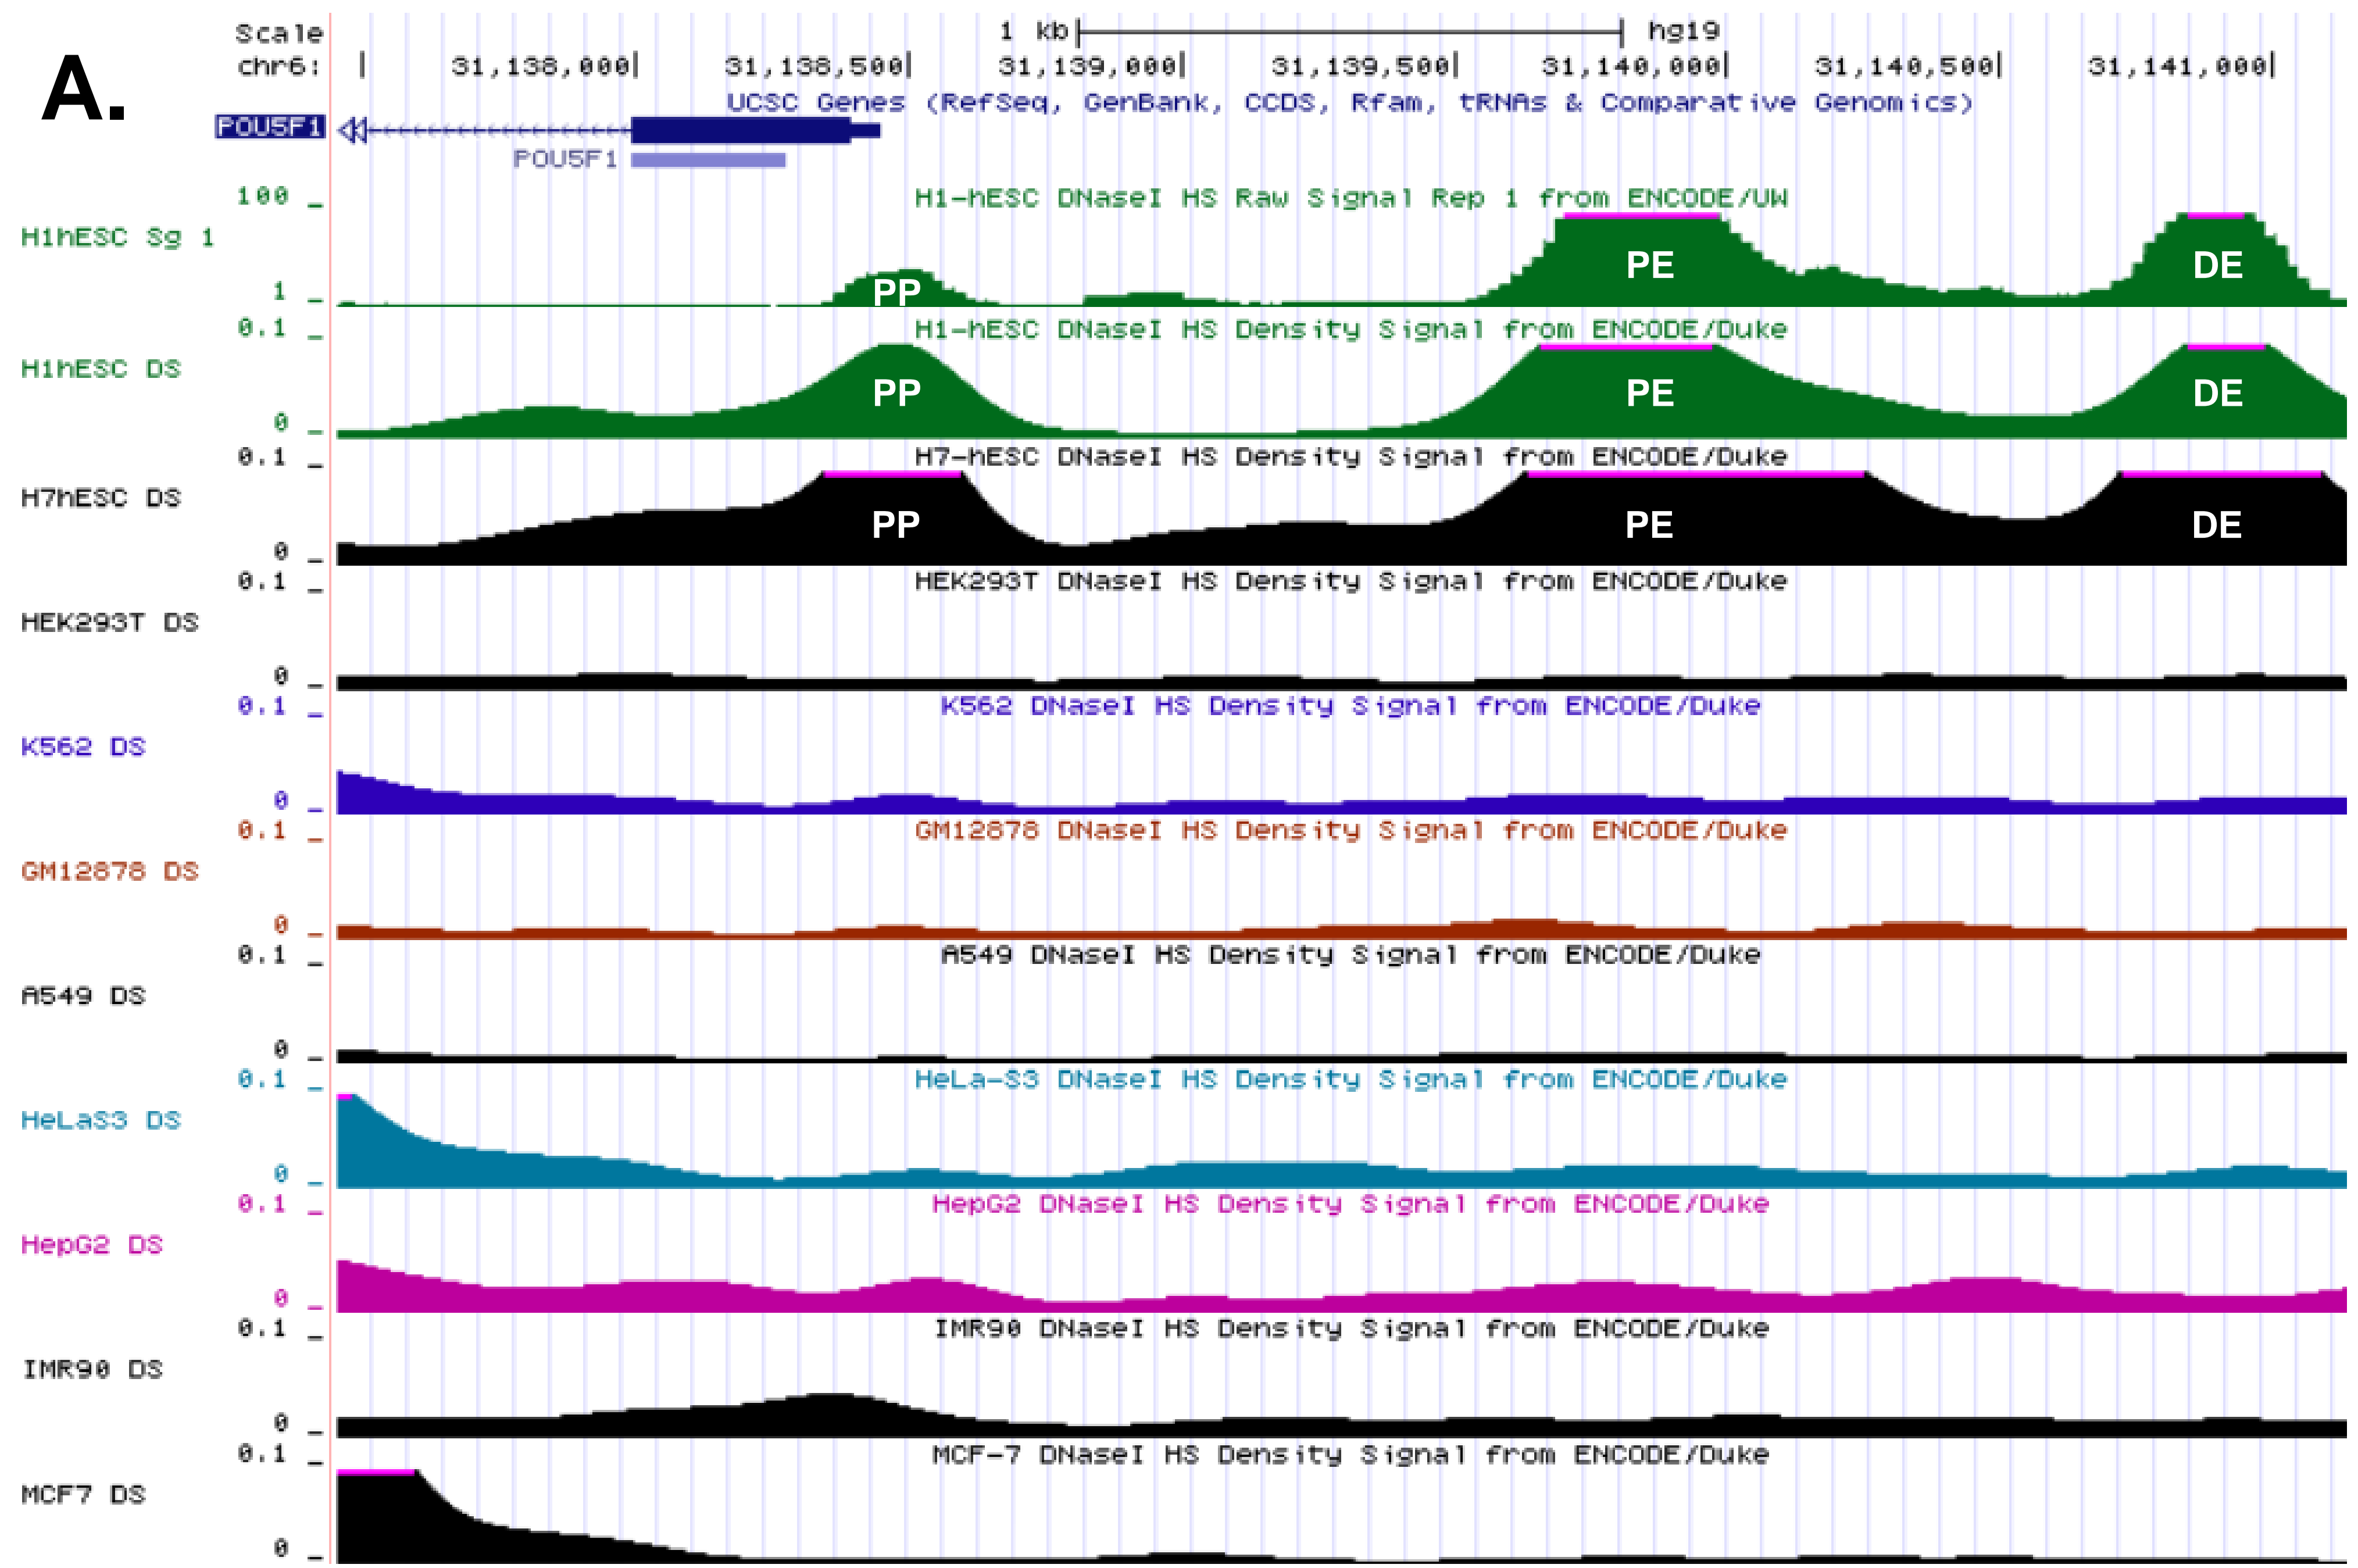

Supplementary Figure 4A



**B.**

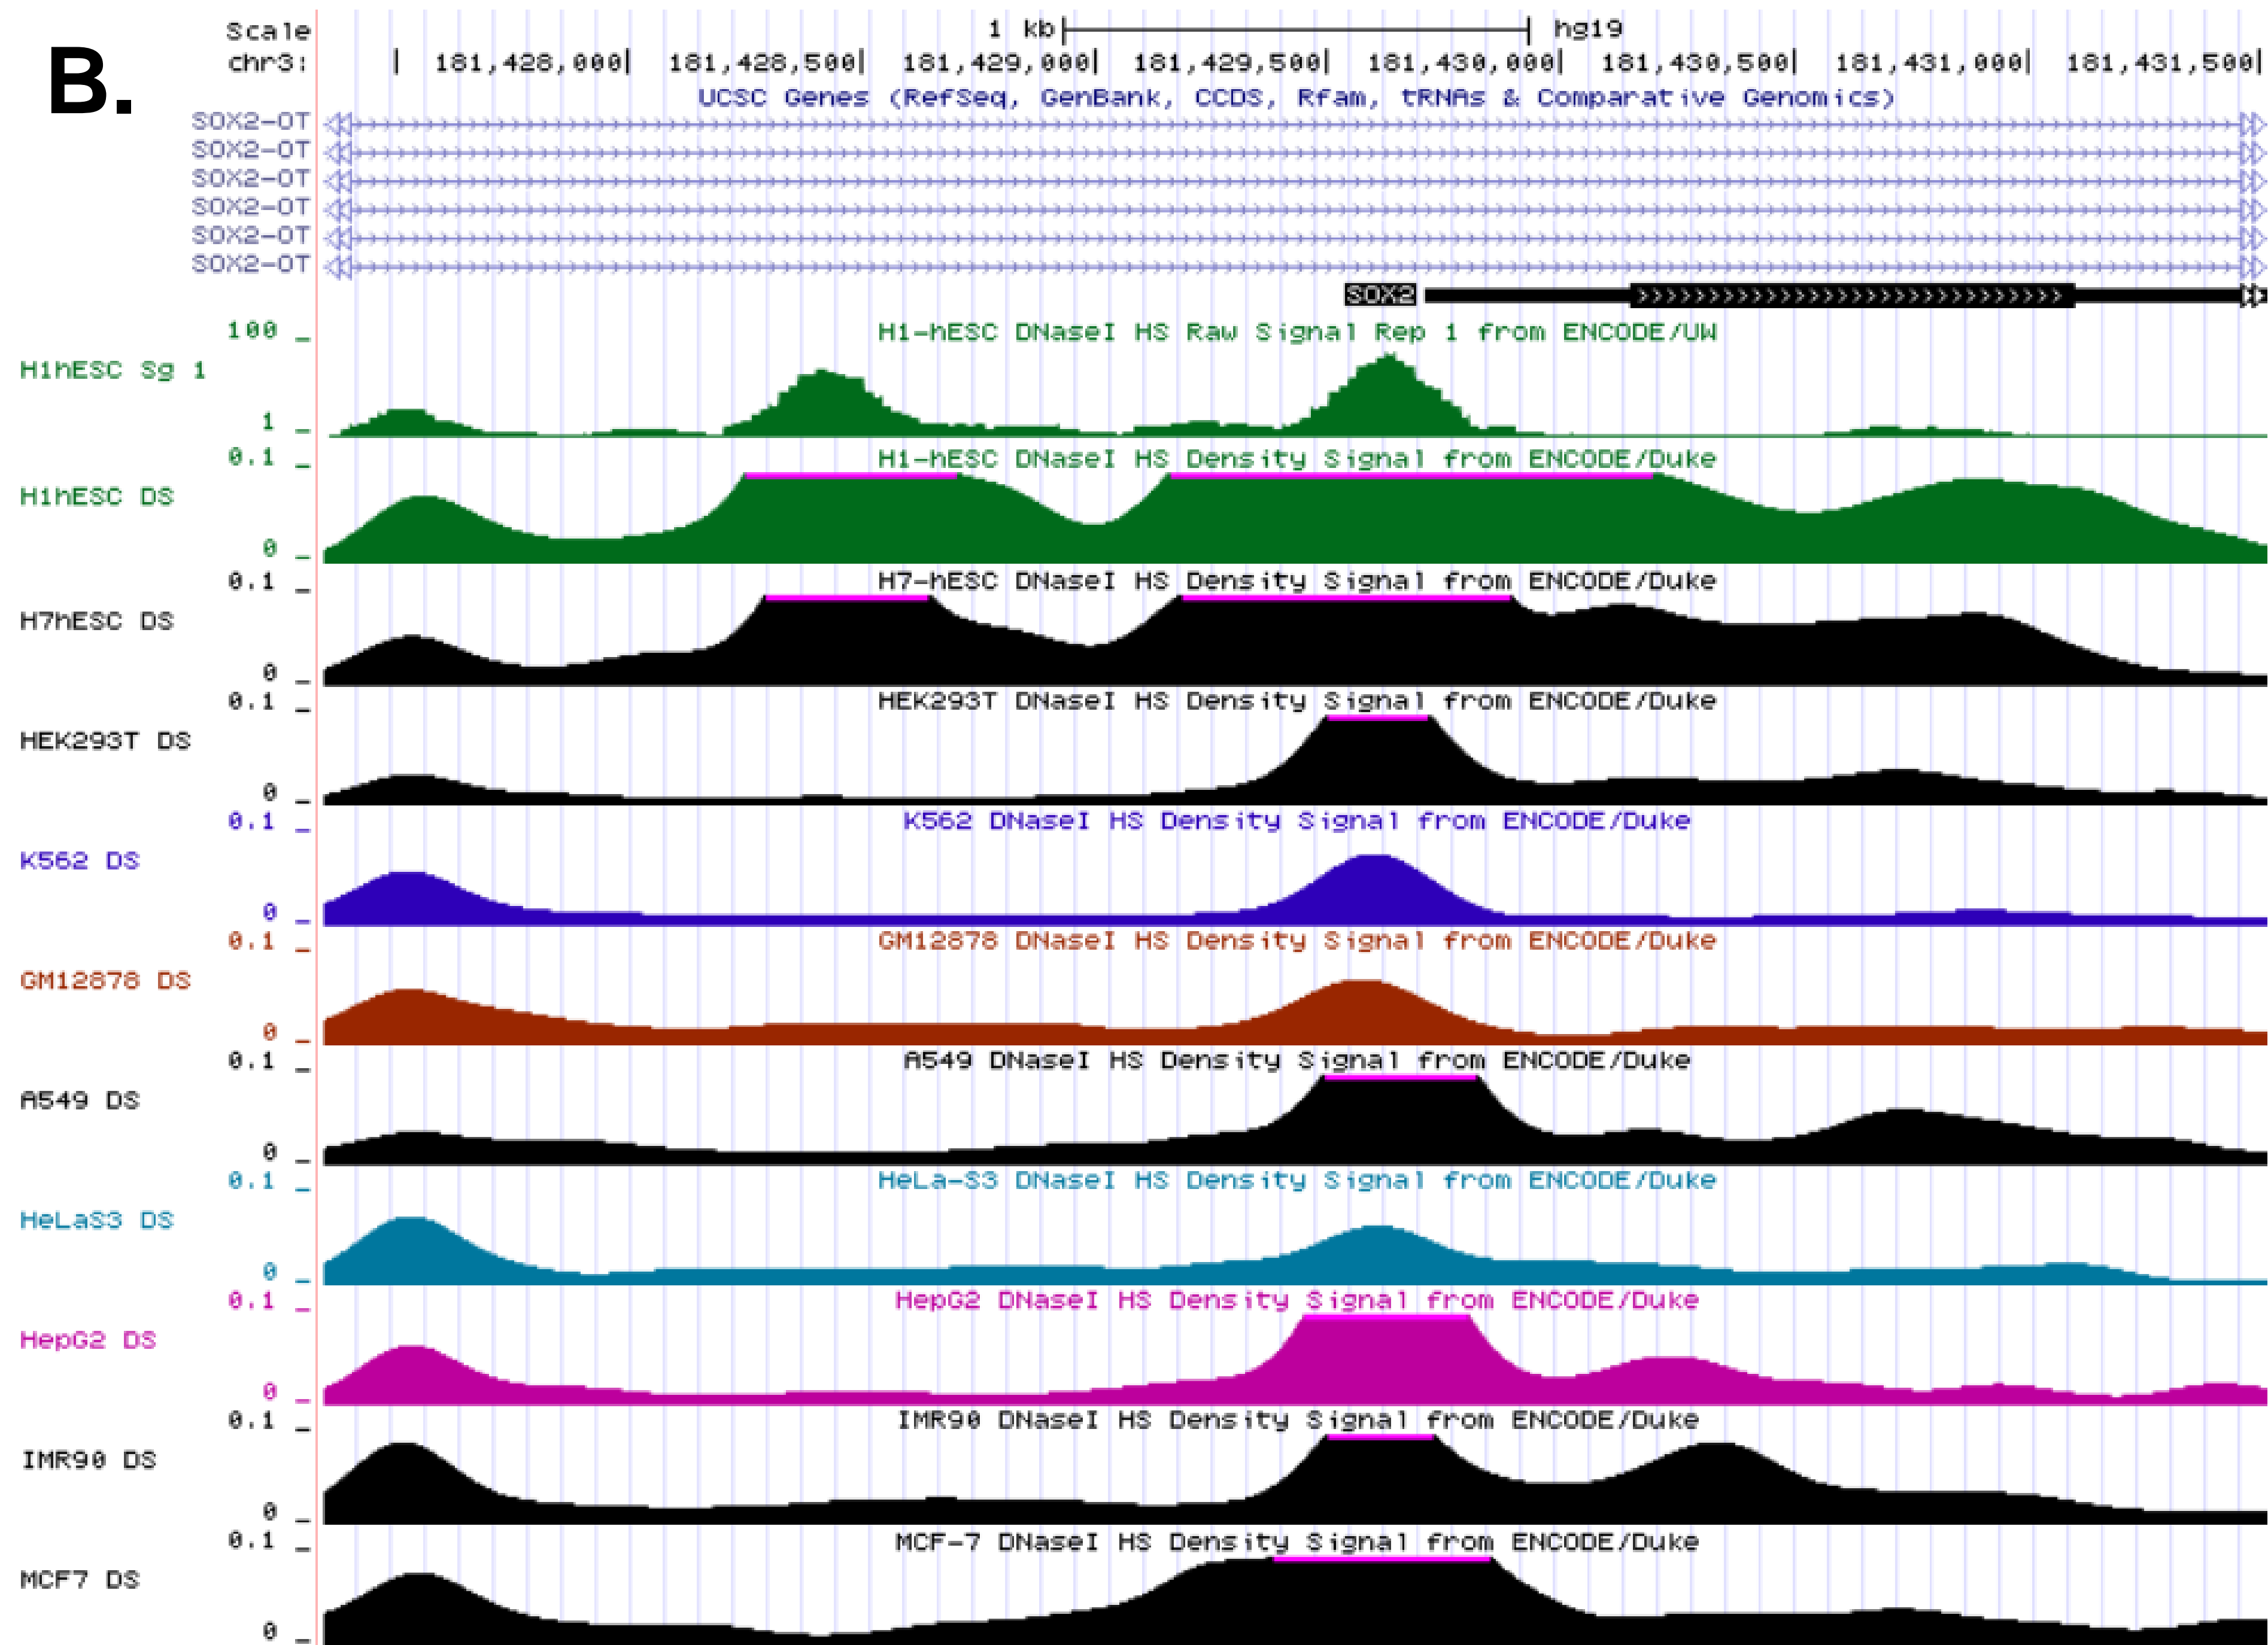

Supplementary Figure 4B



C.

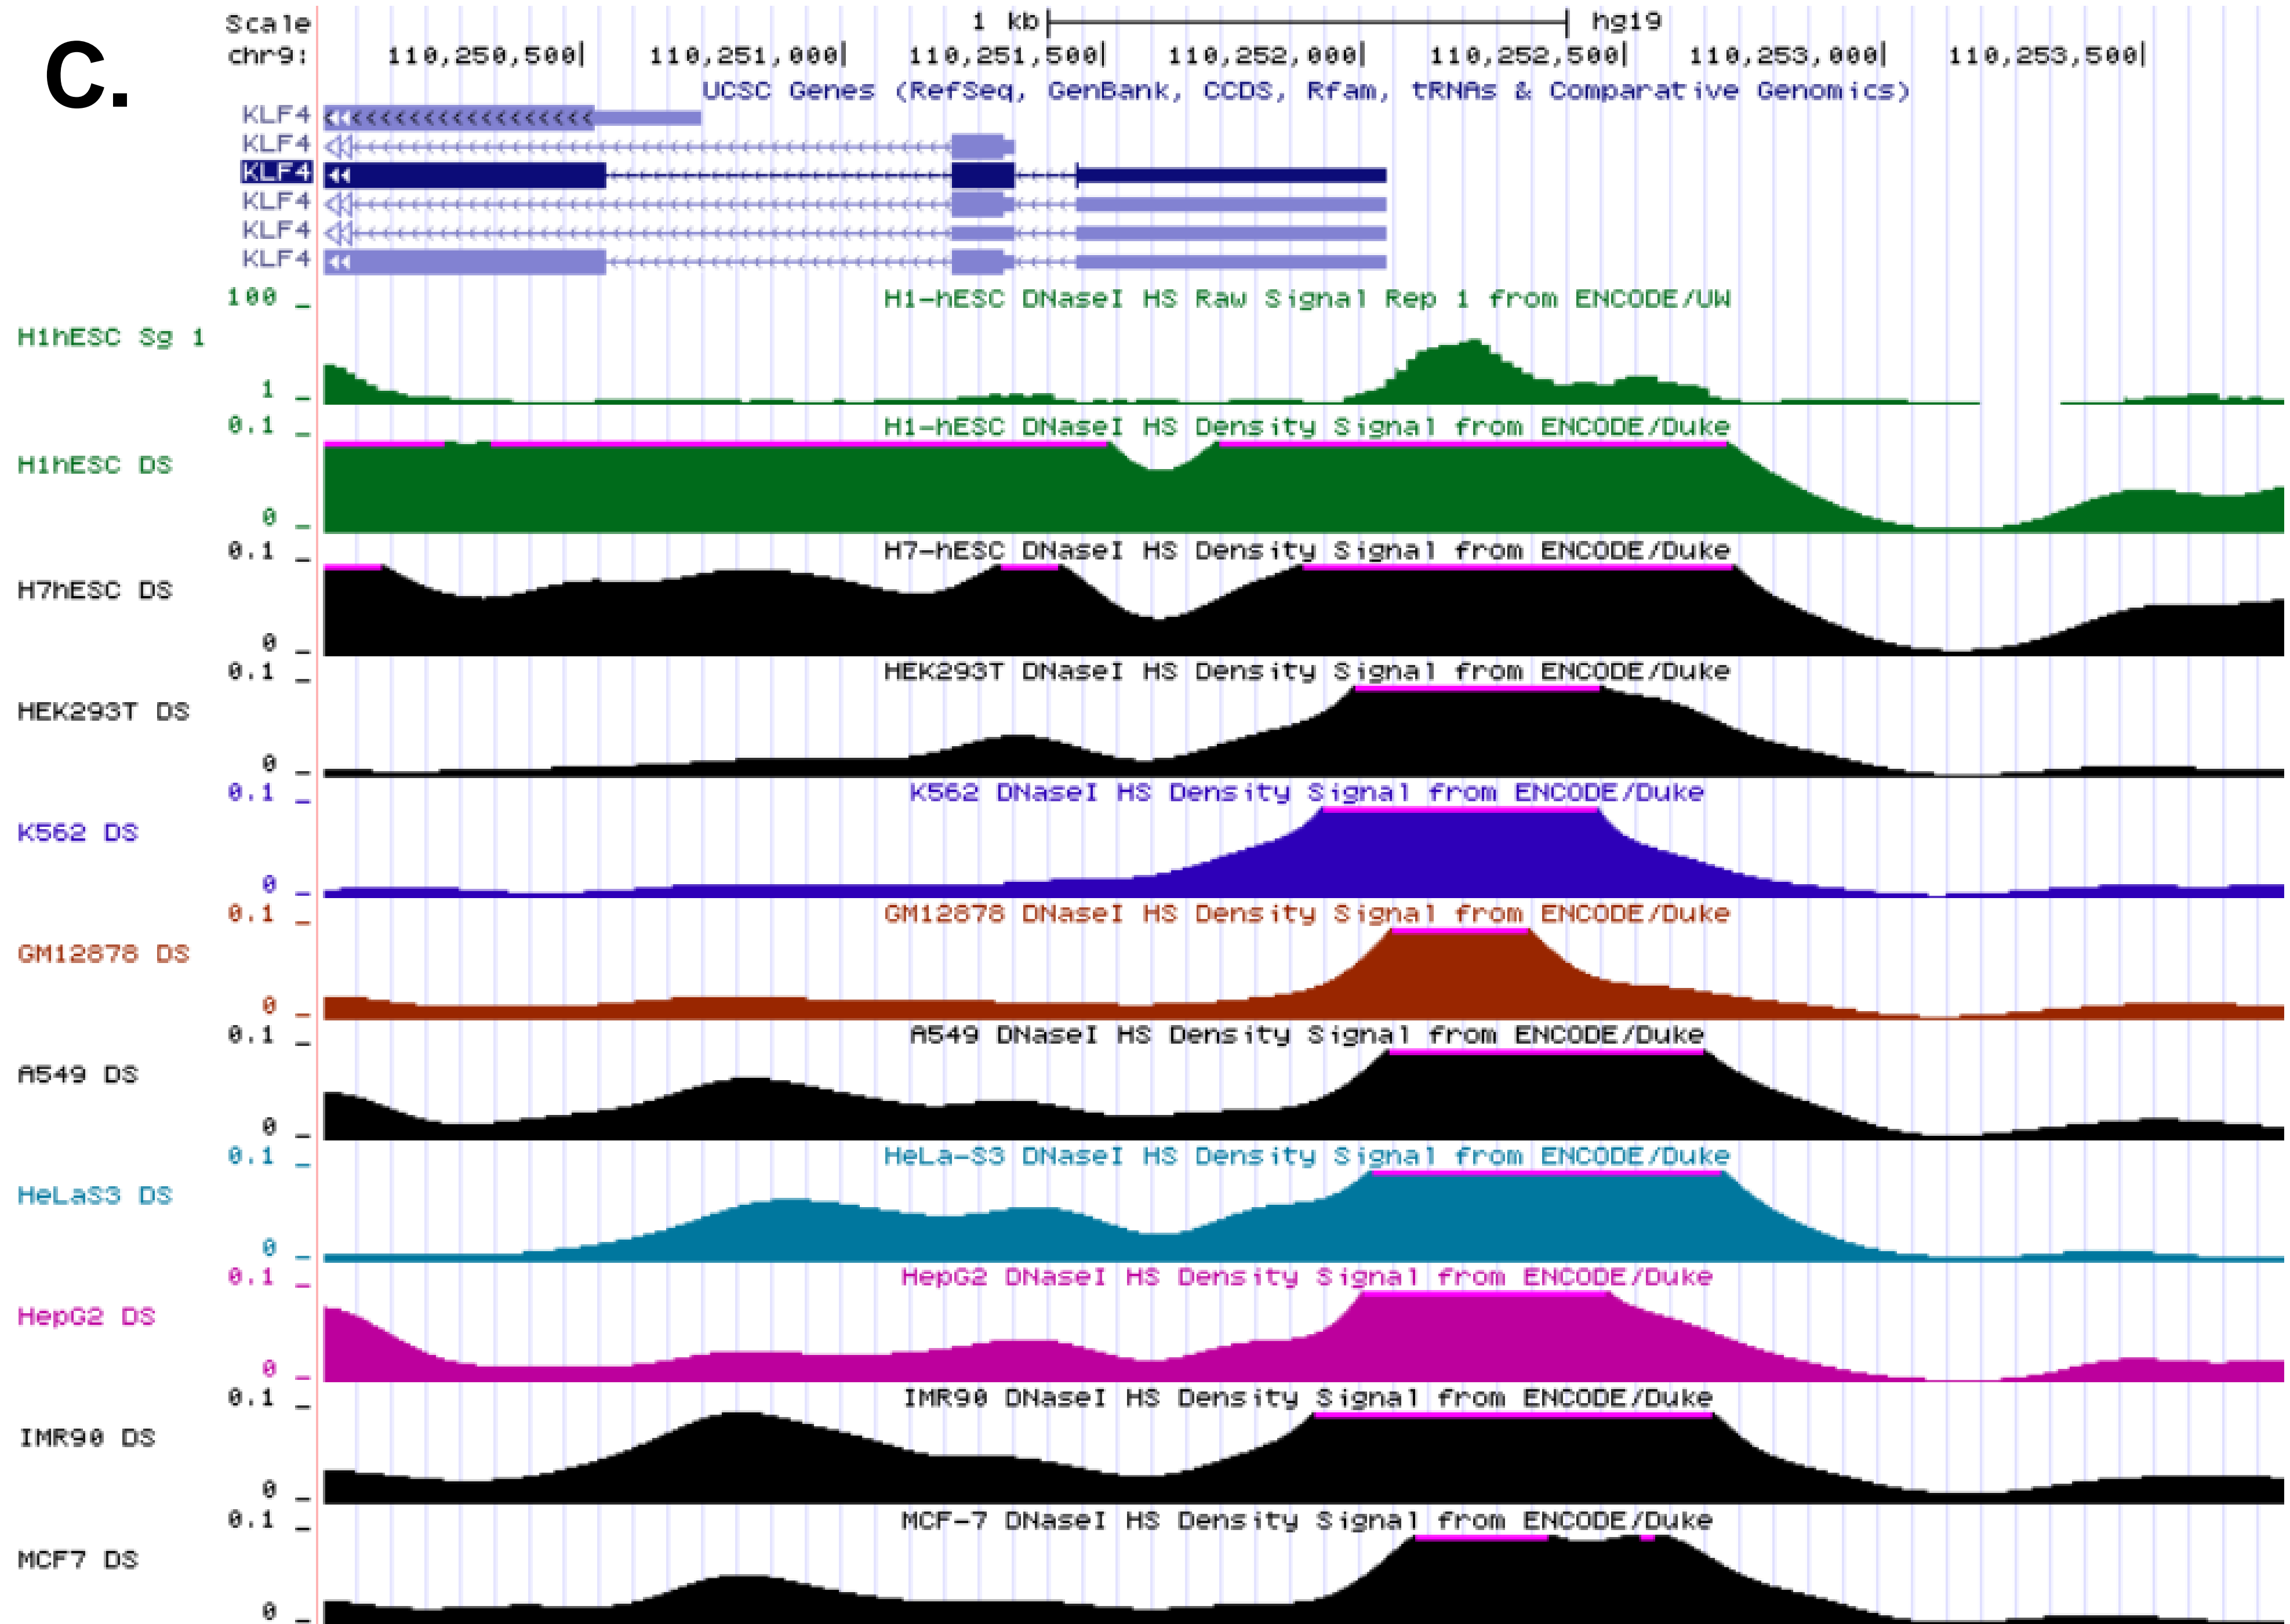

Supplementary Figure 4C

D.

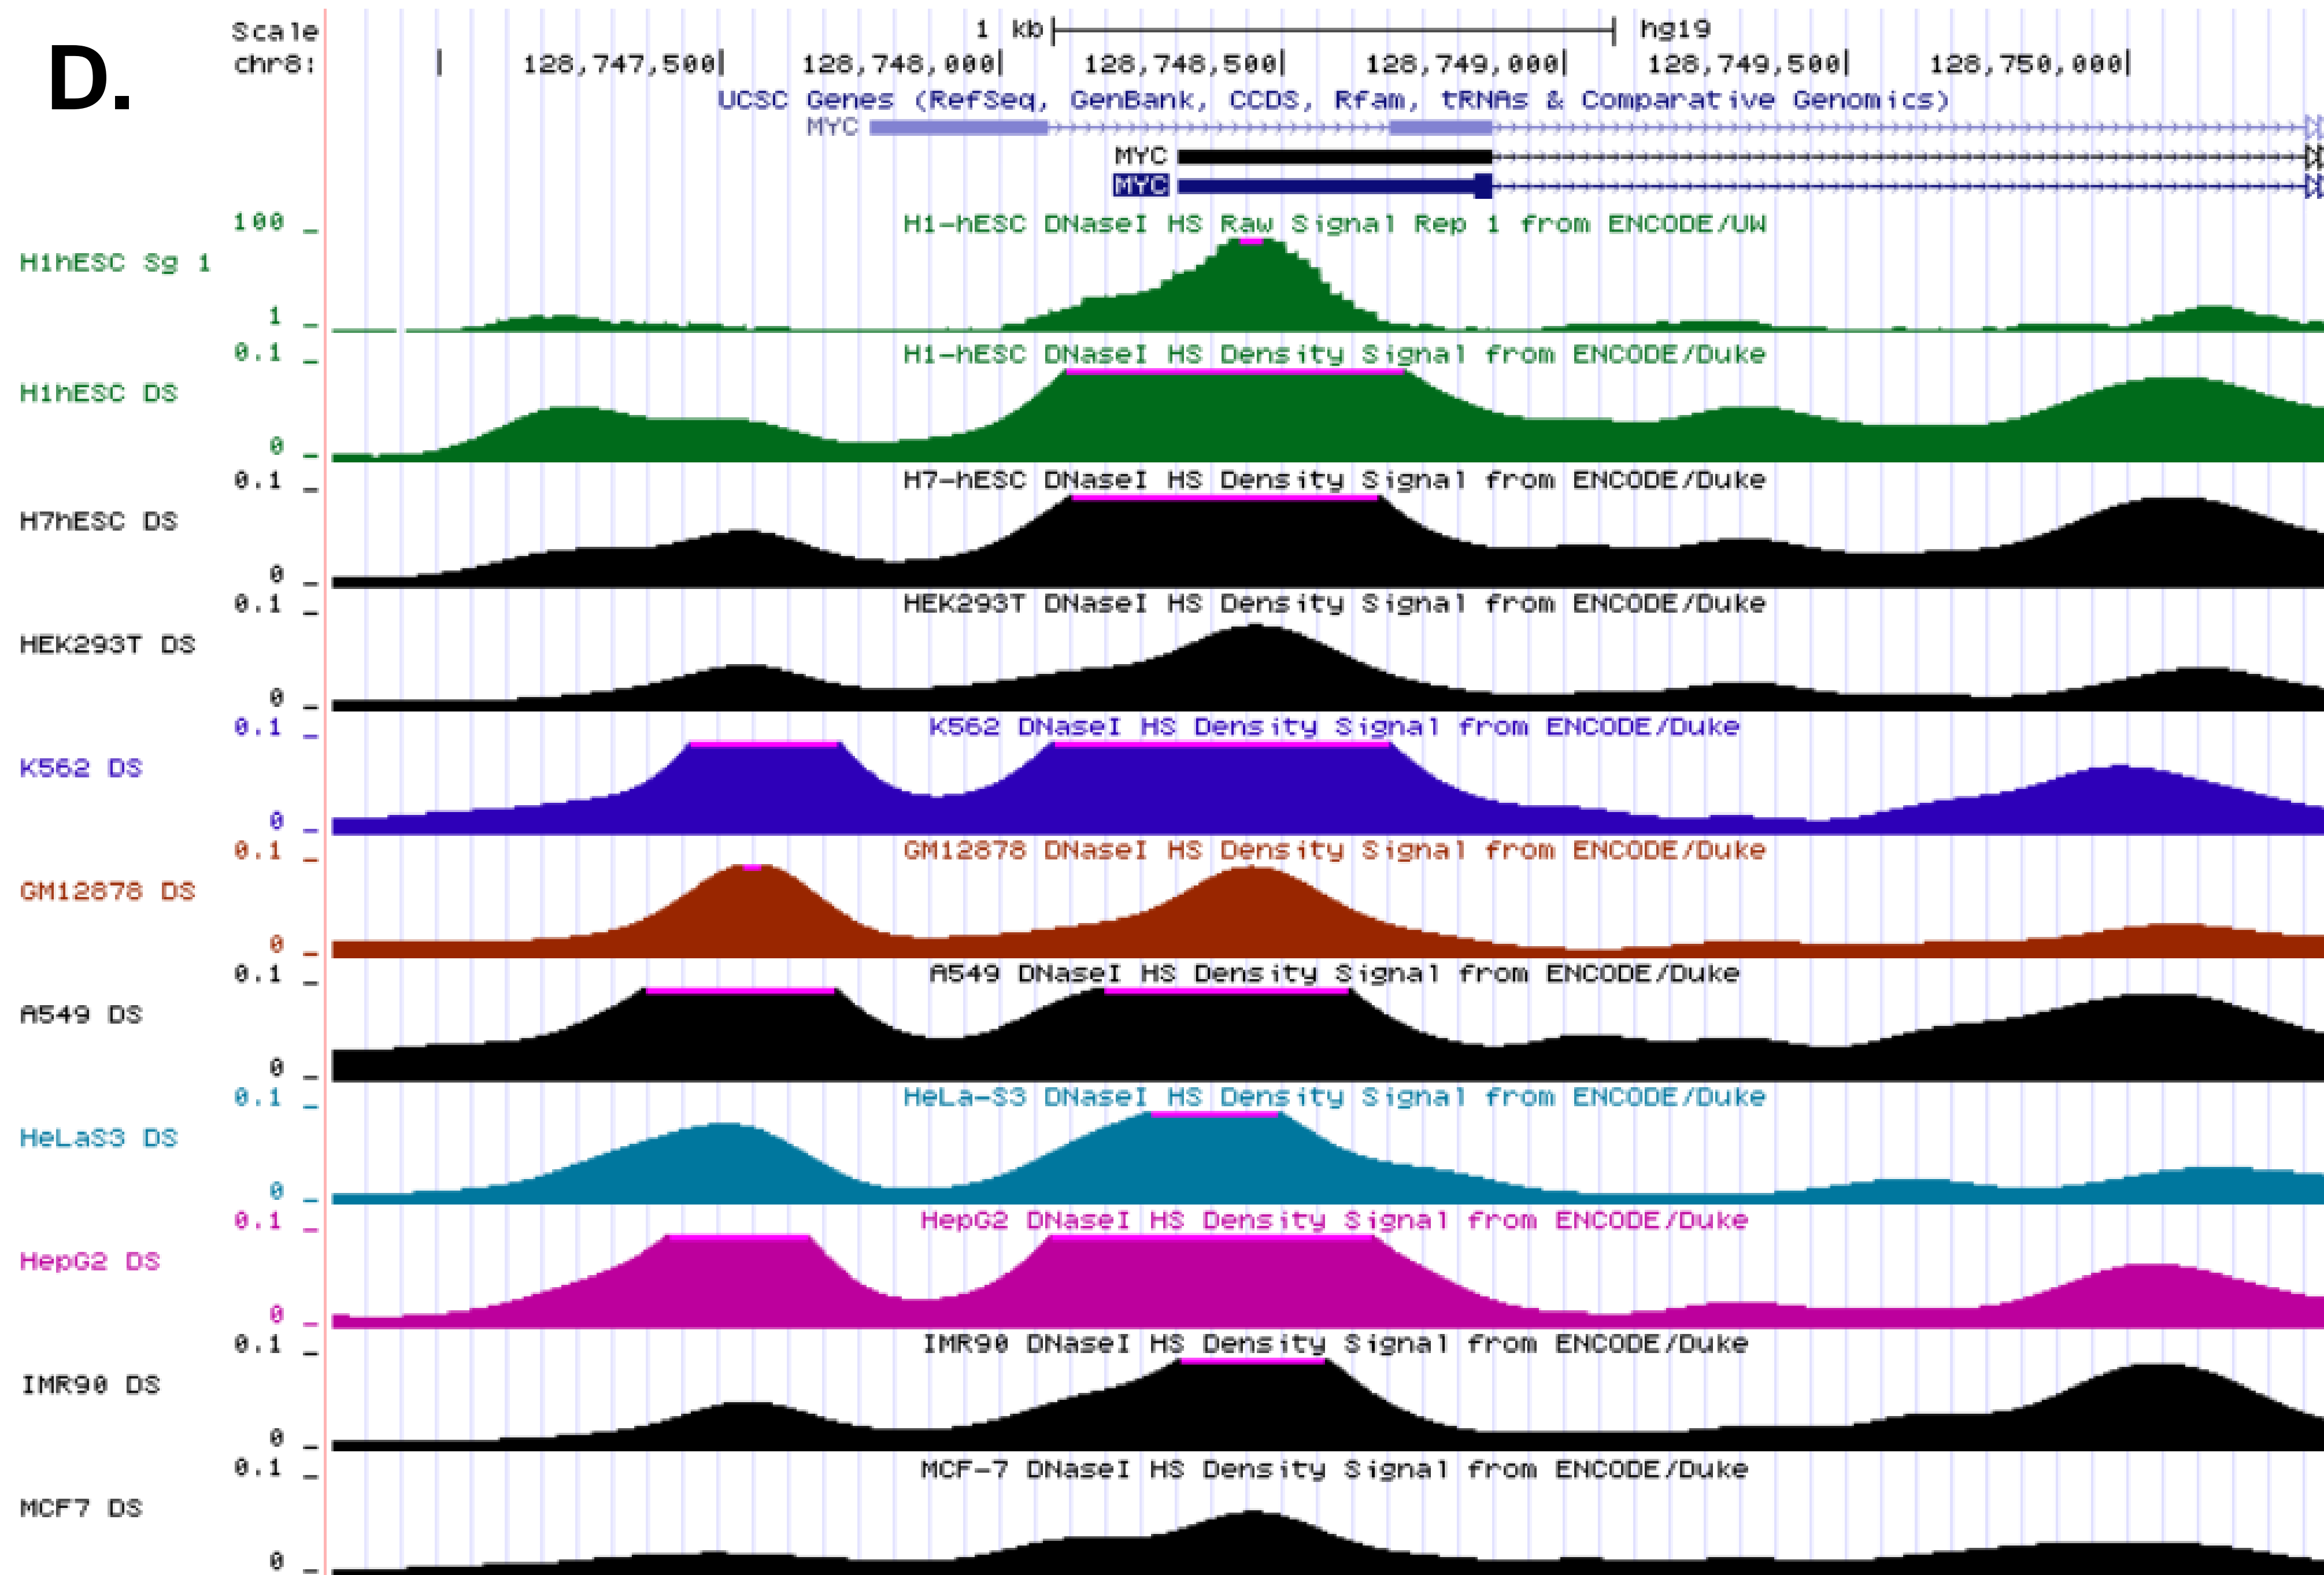

Supplementary Figure 4D

E.

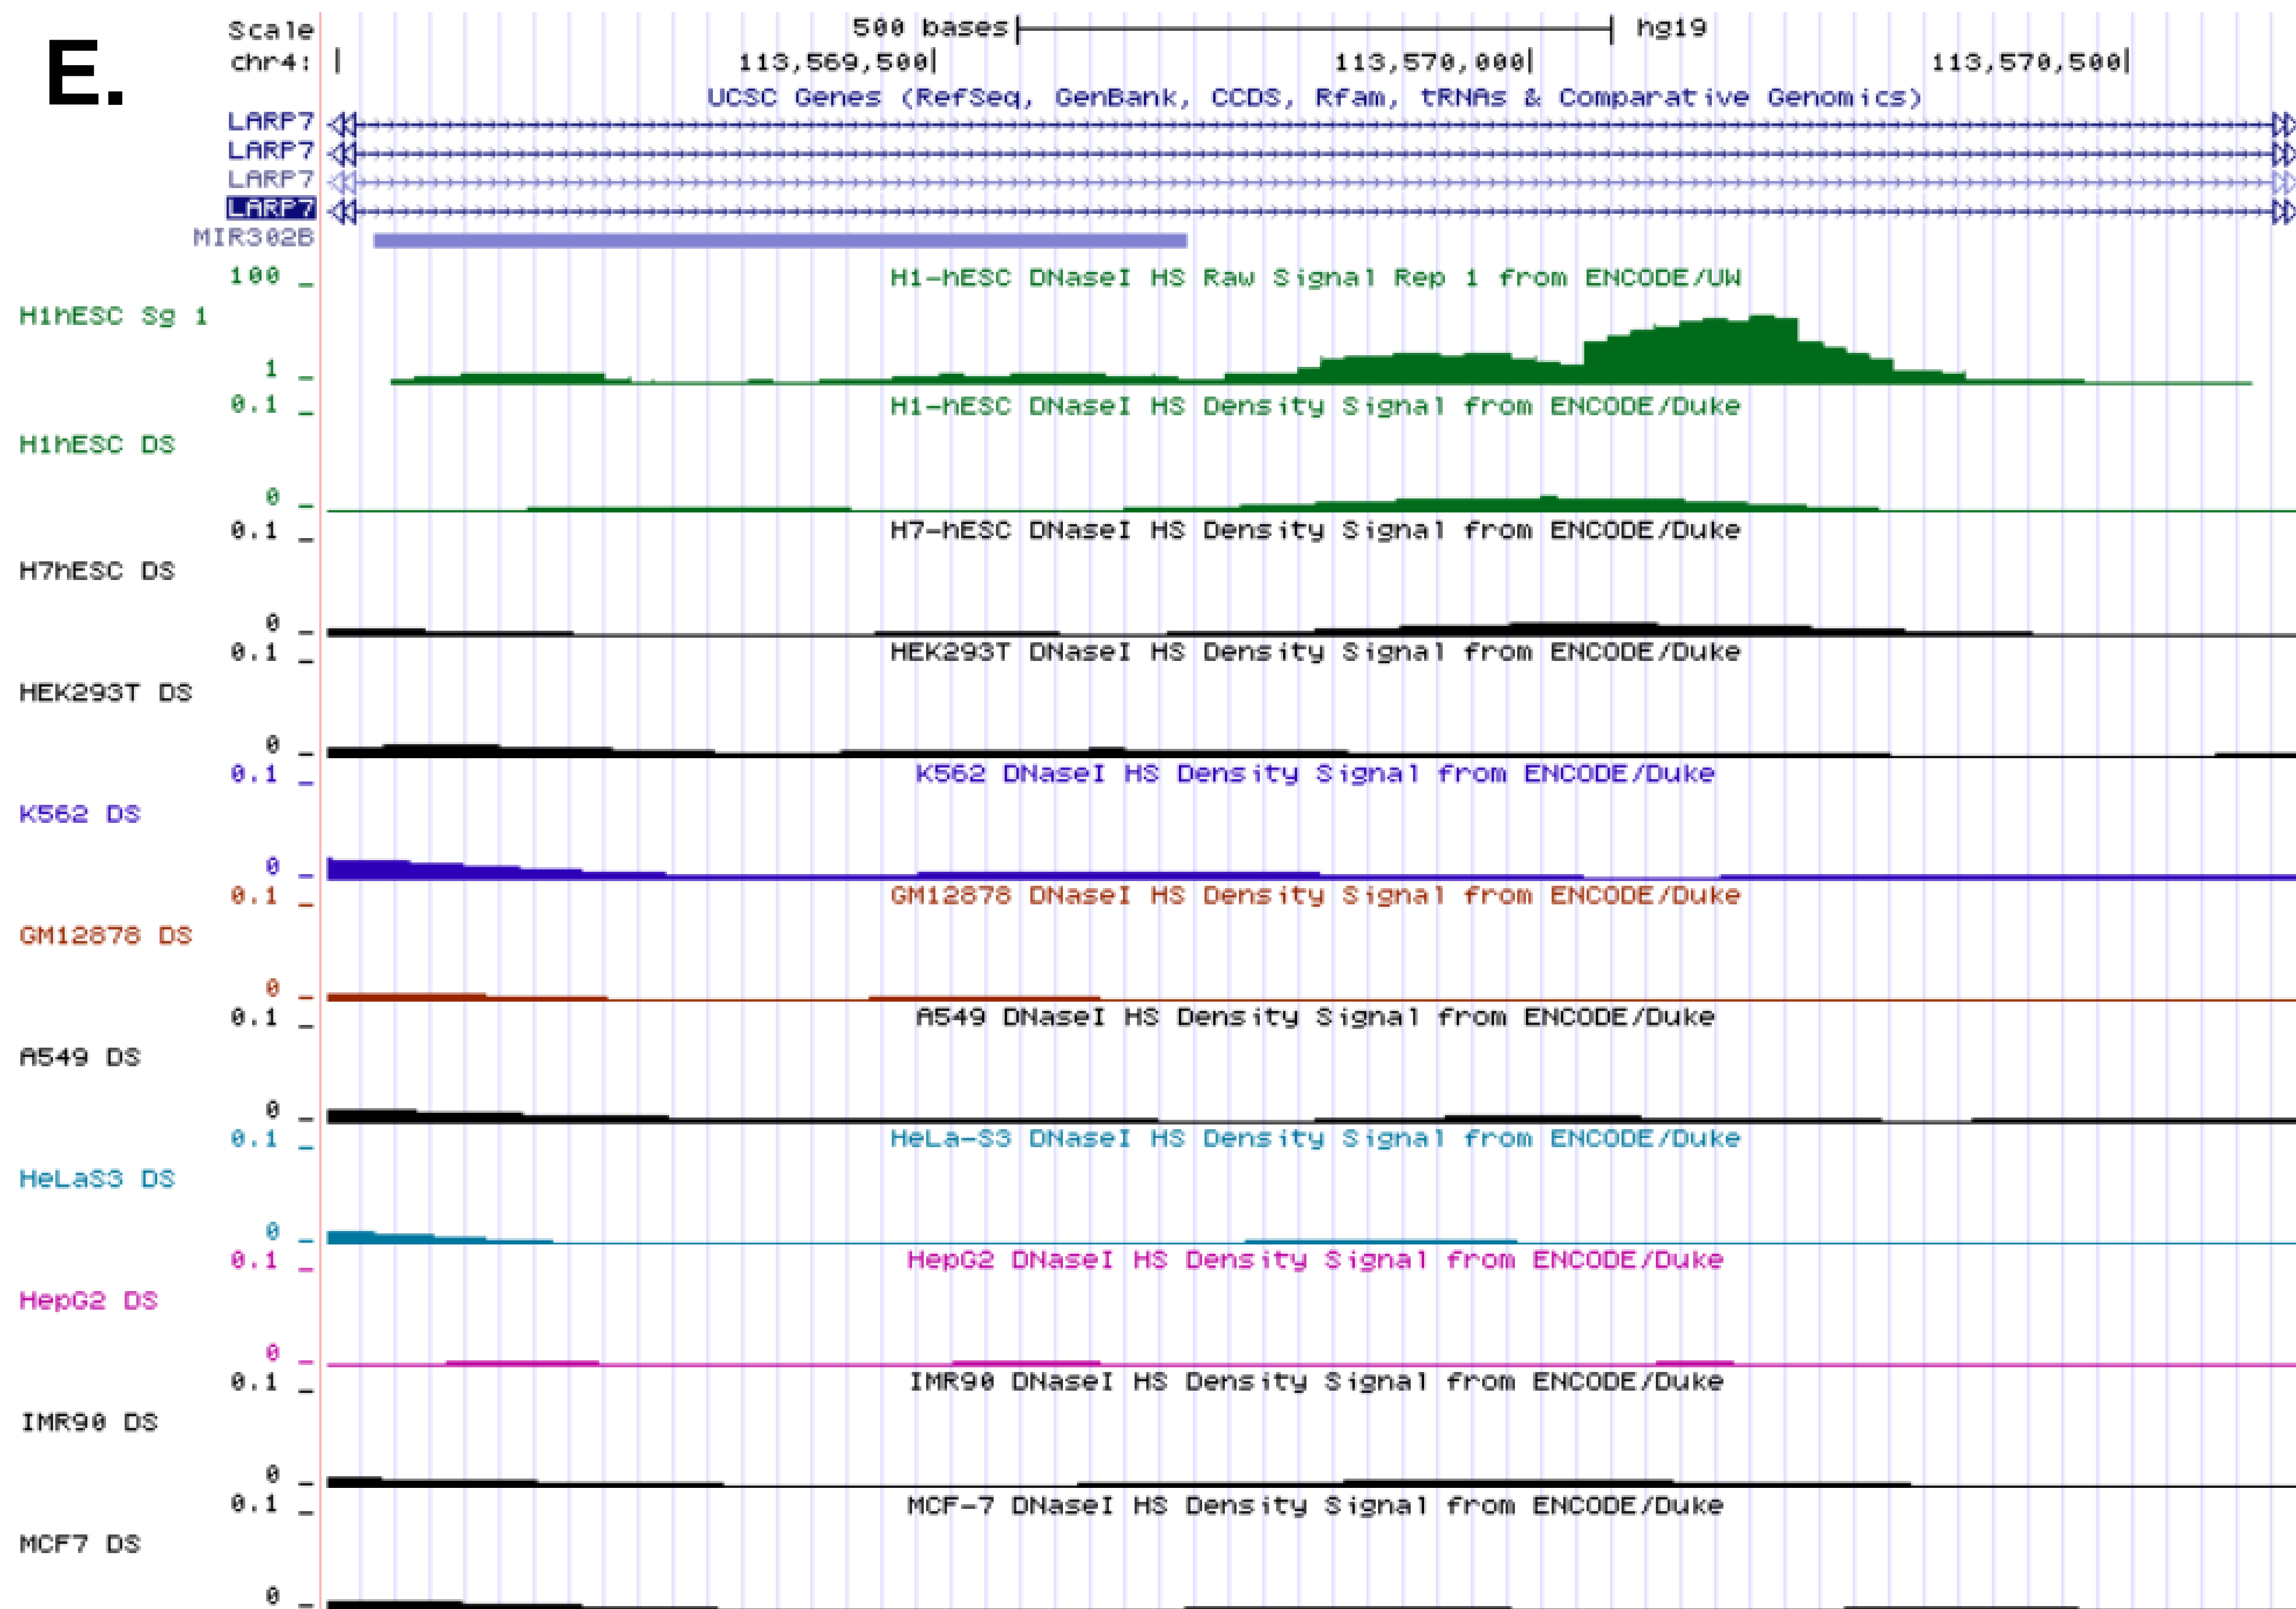

Supplementary Figure 4E
